1           **Heat Shock Factor 1 (HSF1) specifically potentiates c-MYC-mediated**  
2           **transcription independently of the canonical heat-shock response**

3  
4 Meng Xu<sup>1,#</sup>, Ling Lin<sup>1,#</sup>, Kun-Han Chuang<sup>1,2</sup>, Babul Ram<sup>1</sup>, Siyuan Dai<sup>3</sup>, Kuo-Hui Su<sup>1,4</sup>, Zijian  
5 Tang<sup>1,5</sup>, and Chengkai Dai<sup>1,\*</sup>

6  
7 <sup>1</sup>Mouse Cancer Genetics Program, Center for Cancer Research, National Cancer Institute-  
8 Frederick, Frederick, MD 21702, USA

9 <sup>2</sup>Current address: The School of Basic Medical Sciences, Fujian Medical University, Fuzhou,  
10 Fujian Province, P. R. China 350108

11 <sup>3</sup>Graduate School of Biomedical Sciences, University of Massachusetts Medical School,  
12 Worcester, MA 01655, USA

13 <sup>4</sup>Current address: Department of Cancer Biology, The University of Toledo, Toledo, OH 43606,  
14 USA

15 <sup>5</sup>Current address: College of Biomedicine and Health, Huazhong Agricultural University,  
16 Wuhan, Hubei Province, P. R. China 430070

17 # These authors contributed equally

18 \*Correspondence: [chengkai.dai@nih.gov](mailto:chengkai.dai@nih.gov)

19  
20 **Key words:** GCN5, HSF1, c-MYC, transcription factor complex, transcriptional amplification

24  
25  
26  
27  
28  
29  
30  
31  
32  
33  
34  
35  
36  
37  
38  
39  
40  
41  
42  
43  
44  
45  
46

**ABSTRACT**

Despite its pivotal roles in biology, how the transcriptional activity of c-MYC is attuned quantitatively remain poorly defined. Here, we show that heat shock factor 1 (HSF1), the master transcriptional regulator of the heat-shock, or proteotoxic stress, response, acts as a key modifier of the c-MYC-mediated transcription. HSF1 deficiency diminishes c-MYC DNA binding and dampens its transcriptional activity genome-widely. Mechanistically, c-MYC, MAX, and HSF1 assemble into a transcription factor complex on genomic DNAs and, surprisingly, the DNA binding of HSF1 is dispensable. Instead, HSF1 physically recruits the histone acetyltransferase GCN5, thereby promoting histone acetylation and augmenting c-MYC transcriptional activity. Thus, our studies reveal that HSF1 specifically potentiates the c-MYC-mediated transcription, distinct from its role in the canonical heat-shock response. Importantly, this mechanism of action engenders two distinct c-MYC activation states, primary and advanced, which may be important to accommodate diverse physiological and pathological conditions.

## 47 INTRODUCTION

48 The *MYC* proto-oncogene family encodes a class of bHLH/ZIP transcription factors consisting of  
49 C-, L-, and N-MYC, which govern a plethora of cellular functions including cell proliferation,  
50 differentiation, apoptosis, metabolism, and others<sup>1,2</sup>. The most prominent member of this family  
51 is *c-MYC*. Dysregulation of *c-MYC*, occurring in over 70% of all human cancers, is associated  
52 with poor patient outcomes<sup>3,4</sup>. Moreover, *c-MYC* is a key player in pluripotency  
53 reprogramming<sup>5,6</sup>. Following heterodimerization with MYC-associated factor X (MAX), *c-MYC*  
54 binds to the E-box (5'-CACGTG-3') element or its variants on genomic DNAs and regulates the  
55 transcription of up to 15% of all human genes<sup>1-4</sup>. To achieve effective DNA binding and  
56 transcription initiation, cofactors are recruited to remodel the chromatin architecture. Among  
57 these cofactors is the STAGA (SPT3-TAF(II)31-GCN5L acetylase) complex<sup>7,8</sup>. Within this  
58 complex, GCN5/KAT2A is a histone acetyltransferase that can acetylate histone H3 at lysine 9  
59 (H3K9), lysine 14 (H3K14), and other lysine residues<sup>9,10</sup>. Histone acetylation facilitates the  
60 rearrangement of chromatins from a condensed state to a transcriptionally accessible state,  
61 permitting transcription factors to access DNA for gene expression regulation<sup>11</sup>.

62  
63 Heat shock factor 1 (HSF1) is the master regulator of the heat-shock, or proteotoxic stress,  
64 response (HSR/PSR), an evolutionarily conserved cytoprotective transcriptional program helping  
65 cells adapt to a wide variety of environmental and pathological challenges<sup>12,13</sup>. Following  
66 trimerization, nuclear translocation, posttranslational modifications, and recognition of the heat  
67 shock element (HSE), which is canonically composed of 5'-GAANN TTC-3' nucleotide  
68 sequence motif<sup>12,13</sup>, HSF1 governs the transcription of genes involved in protein folding and  
69 degradation, particularly molecular chaperones or heat shock proteins (*HSPs*), in response to

70 proteotoxic stress. Contrasting with its broadly acclaimed role in maintaining proteomic stability  
71 and promoting survival under stress, HSF1 potently enables malignancy<sup>14,15</sup>. The pro-oncogenic  
72 mechanisms of HSF1 appear to be multifaceted, including suppressing proteomic instability,  
73 impeding senescence and apoptosis, reprogramming metabolism, and even promoting immune  
74 evasion<sup>16-21</sup>. Whereas deletion of *c-Myc* in mouse embryos caused severe developmental defects  
75 in a broad range of organs<sup>22</sup>, *Hsf1* appears dispensable for embryonic development and cell  
76 viability in the absence of proteotoxic stress<sup>23</sup>. However, in stark contrast to their non-  
77 transformed counterparts, cancerous cells rely on HSF1 for their growth and survival, rendering  
78 it essential to malignancy<sup>24</sup>. Despite their importance to oncogenesis, whether there is an  
79 interplay between c-MYC and HSF1 remains unclear.

80

81 We herein report that HSF1 specifically potentiates the c-MYC-mediated transcriptional  
82 program. Mechanistically, HSF1, c-MYC/MAX dimers, and GCN5 constitute a previously  
83 unrecognized transcription factor complex, the assembly of which is fostered by c-MYC DNA  
84 binding. Through physical interactions with both partners, HSF1 recruits GCN5 to c-MYC,  
85 heightening histone H3 acetylation at c-MYC target gene loci, promoting c-MYC/MAX DNA  
86 binding, and, ultimately, augmenting transcriptional activity. Thus, our studies reveal a new  
87 mode of regulation through which HSF1 dictates the transcriptional capacity of c-MYC.

88

89

90

91

92

## 93 RESULTS

### 94 HSF1 is required for robust c-MYC transcriptional activity

95 Both *c-MYC* and *HSF1* are located on human chromosome 8q24.21-24.3, an amplicon frequently  
96 found in human cancers<sup>25,26</sup>. According to the Cancer Genome Atlas (TCGA) PanCancer studies,  
97 amplification of *c-MYC* and *HSF1* occurs at 8% and 6% of patients, respectively. Among those  
98 patients with *c-MYC* amplification, approximately 59% display co-duplication of *HSF1* (co-  
99 occurrence,  $p < 0.001$ , Fisher's exact test) (Figure 1A). Moreover, the mRNA levels of *c-MYC* and  
100 *HSF1* are positively correlated in human cancers (Figure 1B). Given their prominent roles in  
101 malignancy, we reasoned that the co-amplification and co-expression of *c-MYC* and *HSF1* might  
102 be selected for oncogenesis.

103

104 First, we set out to explore whether HSF1 impacts c-MYC transcriptional activity using a dual  
105 reporter assay, where the expression of secreted alkaline phosphatase (SEAP) is controlled by  
106 binding of c-MYC/MAX to the E-box elements fused to the minimal TATA-like promoter.  
107 Transient overexpression of *c-MYC*<sup>T58A</sup>, a mutant resistant to proteasomal degradation<sup>28</sup>,  
108 activated the reporter, as expected; of note, co-expression of HSF1 enhanced this activation  
109 (Figure 1C). HSF1 did not elevate the levels of endogenous or exogenous c-MYC proteins  
110 (Figure 1C), pinpointing a specific effect on c-MYC transcriptional activation. To demonstrate  
111 this c-MYC activation by HSF1 under physiological conditions, we examined the expression of  
112 several well-defined c-MYC target genes in immortalized mouse embryonic fibroblasts (MEFs)  
113 following *Hsf1* knockdown (KD). Considering that HSF1 becomes constitutively active in  
114 malignant cells, rendering them addicted to HSF1<sup>14</sup>, we elected to perform this experiment using

115 this non-transformed cell type, for which HSF1 is dispensable. Two independent *Hsf1*-targeting  
116 siRNAs both diminished the transcripts of these target genes (Figure S1A).

117

118 Next, we asked whether this c-MYC activation requires the HSF1-mediated transcription. To  
119 address this, we expressed two mutants, HSF1<sup>1-323</sup> lacking the C-terminal transactivation domain  
120 (AD) and HSF1<sup>324-529</sup> lacking the N-terminal DNA-binding domain (DBD), in HEK293T cells.  
121 Both mutants are deficient for transcriptional activity, as shown previously<sup>20</sup>. Interestingly,  
122 HSF1<sup>324-529</sup>, but not HSF1<sup>1-323</sup>, was sufficient to activate the c-MYC reporter (Figure 1D),  
123 strongly suggesting a transcription-independent mechanism. HSP90AA1/HSP90 $\alpha$ , a  
124 transcriptional target of HSF1, was previously reported to stabilize c-MYC proteins<sup>29</sup>. Thus, it  
125 remains possible that HSF1 could regulate c-MYC via HSP90. However, HSP90 overexpression  
126 failed to rescue the diminished mRNAs of c-MYC target genes in *Hsf1*-deficient MEFs, despite  
127 elevated c-MYC proteins (Figure S1B and S1C), arguing against a direct activation of c-MYC by  
128 HSP90. Together, these results illustrate the necessity of HSF1 for c-MYC-mediated  
129 transcription and further indicate that HSF1 regulates c-MYC independently of its intrinsic  
130 transcriptional action.

131

### 132 **HSF1 promotes c-MYC binding to genomic DNAs**

133 How does HSF1 affect c-MYC transcriptional activity? Unexpectedly, HSF1 impacted the DNA  
134 binding capability of c-MYC. This was detected by proximity ligation assay (PLA), a technique  
135 previously adapted to visualize interactions between transcription factors and genomic DNAs  
136 (gDNAs) *in situ*<sup>30</sup>. While the specificity of anti-dsDNA antibodies was demonstrated  
137 previously<sup>30</sup>, siRNA-mediated KD validated the specificity of anti-c-MYC antibodies (Figure

138 S1D). Compared with *Hsf1* wildtype (WT) cells, PLA foci denoting the c-MYC-gDNA  
139 interaction were diminished in *Hsf1* conditional knockout (CKO) MEFs (Figures 1E and 1F), in  
140 which *Hsf1* deletion was induced by 4-hydroxytamoxifen (4-OHT)<sup>31</sup>. Importantly, this defect in  
141 DNA binding was confirmed by conventional c-MYC ChIP. When using equal amounts of  
142 chromatin, c-MYC antibodies precipitated less genomic DNA fragments from *Hsf1*<sup>CKO</sup> MEFs  
143 (Figure 1G).

144  
145 To elucidate how broad this impact on DNA binding was, we employed the CUT&RUN-seq  
146 technique<sup>32</sup>, a new alternative to ChIP-seq, to profile genome-wide c-MYC DNA binding in  
147 these MEFs. Similarly, when using equal numbers of cells, less amounts of nuclease-digested  
148 DNA fragments were released from *Hsf1*<sup>CKO</sup> MEFs (Figure 2A). To account for this global  
149 change in c-MYC DNA binding, we spiked these released DNA fragments with equal amounts  
150 of *E. coli* DNAs as the normalization control. Following spike-in normalization, CUT&RUN-seq  
151 analyses revealed a genome-wide reduction in c-MYC DNA binding in *Hsf1*<sup>CKO</sup> MEFs (Figure  
152 2B). Owing to the extremely low background signals, CUT&RUN-seq identified more than  
153 200,000 binding sites in *Hsf1*<sup>WT</sup> cells; nonetheless, nearly 91% of these binding sites were  
154 located at either intergenic, intronic, or exonic regions (Figure 2C and Table S1). It has been  
155 known that c-MYC frequently binds to intergenic regions<sup>33</sup>. By contrast, approximately 70% of  
156 all binding sites identified in *Hsf1*<sup>CKO</sup> MEFs were associated with promoters, despite  
157 considerably diminished total binding sites (Figure 2C and Table S2). This finding indicates that  
158 *Hsf1* deficiency mostly abolished the c-MYC binding to non-promoter regions. Apart from this  
159 differential genomic distribution, binding sites in *Hsf1*<sup>WT</sup> cells displayed higher signals, a  
160 measure of c-MYC binding affinity, than binding sites in *Hsf1*<sup>CKO</sup> cells, especially those

161 associated with promoters (Figure 2D). Within the same cell types, binding sites located in  
162 promoters displayed the highest signals; by contrast, those located at intergenic and intronic  
163 regions showed the lowest (Figure S2A).

164

165 Whereas commonly applied to histone modification studies, only a few transcription factors have  
166 been investigated using the CUT&RUN-seq technique. To demonstrate the validity of this new  
167 technique, we also performed the conventional ChIP-seq experiments using the very same  
168 antibody and *Hsf1*<sup>WT</sup> MEFs. While CUT&RUN-seq identified total 21,771 unique genes bound  
169 by c-MYC, ChIP-seq only identified 9,992 (Table S3). Of note, nearly 91% of those 9,992 genes  
170 were also detected by CUT&RUN-seq (Figure 2E), demonstrating a high degree of  
171 comparability between these two techniques. Importantly, our CUT&RUN-seq also identified  
172 74% of ENCODE MYC target genes (18,324) (Figure 2E), considering the distinct experimental  
173 conditions. Moreover, CUT&RUN-seq peak sequences were highly enriched for the E-box  
174 motif; by contrast, the HSE motif was far less enriched (Figure S2B). In addition, peak  
175 visualization confirmed the binding of c-MYC to several classic target genes, including *Npm1*,  
176 *Ncl*, *Odc1*, *Cdk4*, and *Hspd1* (Figure S2C). Together, these results validate our CUT&RUN-seq  
177 experiments.

178

179 As expected, the c-MYC target genes in *Hsf1*<sup>WT</sup> and *Hsf1*<sup>CKO</sup> cells almost completely overlapped,  
180 although in *Hsf1*<sup>CKO</sup> cells c-MYC only bound to 31.8% of total target genes (Figure 2F). Despite  
181 weak signals in general, peak visualization confirmed the c-MYC binding to intergenic regions,  
182 (Figure S2D). Of note, an array of *Hsp* genes, spanning all HSP families, were identified as the  
183 targets of c-MYC (Figure 2G and 2H). Among them are several prominent constitutively



184 expressed *Hsp* genes, including *Hspa5/Bip*, *Hspa8/Hsc70*, *Hspa9/Grp75*, *Hsp90ab1/Hsp84*, and  
185 *Hsp90b1/Grp94*. Of great interest, *Hsf1* was also a target of c-MYC (Figure 2H), a finding  
186 further confirmed by ChIP-seq (Figure S2E). These results support an important role of c-MYC  
187 in controlling cellular chaperoning capacity, both constitutive and inducible. Collectively, our  
188 findings indicate that HSF1 promotes c-MYC DNA binding genome-widely, a step crucial to its  
189 transcriptional activity.

190

### 191 **HSF1 physically interacts with c-MYC/MAX dimers**

192 Prompted by the observation that the transcriptional activity of HSF1 is dispensable for c-MYC  
193 regulation, we next explored their potential physical interactions. Co-immunoprecipitation (co-  
194 IP) experiments in HEK293T cells revealed that exogenously expressed FLAG-HSF1 interacted  
195 with both HA-c-MYC and V5-MAX (Figure 3A). Importantly, this interaction also occurred  
196 under physiological conditions. PLA clearly detected the interaction between endogenous HSF1  
197 and c-MYC, predominantly localized within the nucleus, in HeLa cells (Figure 3B).

198 Demonstrating the specificity of PLA, *HSF1* KD markedly diminished the PLA signals. To  
199 validate direct c-MYC-HSF1 interactions *in vitro*, we performed Lumit immunoassays using  
200 recombinant proteins, where protein-protein interactions are indicated by the successful  
201 complementation of split NanoLuc® luciferase that are conjugated with two distinct antibodies<sup>34</sup>.

202 Consistent with the co-IP and PLA results, GST-HSF1 did interact with c-MYC/MAX  
203 heterodimers *in vitro* compared to GST controls, evidenced by markedly elevated luminescence  
204 signals (Figure 3C). Next, we asked whether HSF1 can impact the interactions between c-MYC  
205 and MAX. Interestingly, HSF1 impaired the luciferase complementation denoting c-MYC-MAX  
206 interactions (Figure 3D). This finding suggests that HSF1 either induced conformational changes

207 in the c-MYC/MAX heterodimer or simply blocked the recognition of c-MYC/MAX by  
208 antibodies. Nonetheless, either case supports a physical interaction between HSF1 and c-  
209 MYC/MAX dimers, which is further evidenced by *in vitro* pull-down assays. Recombinant His-  
210 HSF1 proteins were pulled down by GST-tagged c-MYC proteins, but not by GST proteins alone  
211 (Figure S3A). *Vice versa* was also true (Figure S3B). Moreover, these pull-down assays reveal  
212 that c-MYC alone can interact with HSF1.

213  
214 Do HSF1 interactions affect the DNA binding of c-MYC/MAX dimers? To address this, we took  
215 advantage of a simple *in vitro* system, where recombinant c-MYC/MAX dimers can directly bind  
216 to DNA oligos containing the canonical E-box element that were immobilized on ELISA  
217 microtiter plates. This system was validated for capturing endogenous c-MYC/MAX dimers  
218 from nuclear extracts of MEFs with and without competition of free E-box elements (Figure  
219 S3C). Compared to GST controls, co-incubation with GST-HSF1 enhanced the binding of c-  
220 MYC/MAX dimers to E-box elements by over 60% (Figure 3E). This finding concurs with our  
221 cellular studies (Figures 1F and 1G).

222  
223 **The c-MYC-MAX-HSF1 complex assembles on genomic DNAs**  
224 Whereas PLA can readily detect endogenous c-MYC-HSF1 interactions, co-IP of both has been  
225 technically challenging. Given the exclusive nuclear localization of PLA foci, we considered the  
226 possibility that the c-MYC/MAX-HSF1 complex might preferentially assemble on genomic  
227 DNAs. Therefore, regular cell lysis conditions would largely disrupt their associations.

228

229 First, we asked whether DNA binding is required for the interaction between HSF1 and c-  
230 MYC/MAX. To test this, we treated HEK293T cell lysates overexpressing FLAG-HSF1, HA-c-  
231 MYC, and V5-MAX with Ethidium bromide (EtBr). EtBr is known to disrupt DNA-dependent  
232 protein associations<sup>35</sup>. Of note, the whole cell lysates were prepared by sonication, under which  
233 genomic DNA fragments were present. EtBr treatment markedly abolished the interaction  
234 between HSF1 and c-MYC/MAX (Figure 3F), suggesting the dependency on genomic DNA  
235 binding. To exclude the possible contribution of cellular RNAs, RNase and DNase were applied  
236 to digest relevant substrates in these cell lysates, respectively. Treatment with DNase, but not  
237 RNase, disrupted the complex assembly (Figure 3G), demonstrating the necessity of genomic  
238 DNA binding. Of note, co-IP experiments cannot exclude the possibility that c-MYC and HSF1  
239 may be brought together via their co-occupancy of adjacent genomic DNAs (Figure 3H).  
240 However, this scenario would predict: 1) HSF1 DNA binding is required for c-MYC  
241 transcriptional activity; and 2) HSF1 and c-MYC lack physical interactions. Apparently, both  
242 predictions have already been refuted (Figure 1D and 3B). To further demonstrate the  
243 dependency on DNA binding at physiological conditions, bright field PLA was performed *in situ*  
244 to avert potential interference from EtBr fluorescence. The results confirmed a direct interaction  
245 between endogenous c-MYC and HSF1 in HeLa cells, which, importantly, was largely disrupted  
246 by EtBr treatment (Figure 3I). Collectively, these findings support nuclear assembly of c-MYC-  
247 MAX-HSF1 complexes, a physiological event markedly facilitated by genomic DNA binding.

248

#### 249 **HSF1 activates c-MYC transcriptional activity via GCN5**

250 How does HSF1 promote c-MYC DNA binding and transcriptional activation? Chromatin  
251 structure/topography affects the accessibility of genomic DNAs to transcription factors<sup>11</sup>. It was

252 reported that c-MYC can recruit chromatin-modifying complexes, such as the STAGA co-  
253 activator complex containing the histone acetyltransferase GCN5, to remodel chromatin  
254 structures<sup>8,36</sup>.

255

256 First, we asked whether GCN5 is important to c-MYC transcriptional activity by knocking down  
257 *Gcn5* in MEFs. Resembling *Hsf1* deficiency, *Gcn5* KD diminished the expression of c-MYC  
258 target genes (Figure 4A). A similar result was also obtained from the c-MYC reporter assay  
259 (Figure S4A), indicating that GCN5 is crucial to c-MYC transcriptional activity. Next, we asked  
260 whether HSF1 activates c-MYC via GCN5. As demonstrated above (Figure 1B), both the full-  
261 length HSF1<sup>1-529</sup> and transcription-deficient HSF1<sup>324-529</sup> mutants enhanced c-MYC activity;  
262 however, this activation was largely blocked by *GCN5* KD (Figure 4B), indicating a requirement  
263 for GCN5. Conversely, *GCN5* overexpression activated c-MYC without elevating its protein  
264 levels (Figure S4B). Of note, GCN5 overexpression was sufficient to rescue the diminished  
265 DNA binding of c-MYC in *Hsf1*<sup>CKO</sup> MEFs (Figure 4C).

266

267 To determine how widespread the impacts of HSF1 on c-MYC transcriptional activity are, we  
268 conducted RNA-seq experiments. To avoid potential interference of 4-OHT with transcription<sup>37</sup>,  
269 we resorted to *Hsf1* KD in MEFs (Figure S4C). Interestingly, extraction of total RNAs from  
270 equal numbers of MEFs revealed that *Hsf1* KD resulted in a 18% reduction in RNA levels  
271 (Figure 4D). To account for this difference, we incorporated ERCC RNA spike-in controls  
272 during RNA extraction. Following appropriate normalization, RNA-seq data analyses revealed  
273 that total 2,909 genes were differentially expressed, both up-regulated and down-regulated,  
274 between the control and *Hsf1*-KD groups (Figure 4E and Table S4). In line with the overall

275 reduction in total RNAs following *Hsf1* KD, those down-regulated genes displayed considerably  
276 higher abundance than those up-regulated genes (Figure 4F and Table S5). These changes in  
277 gene expression were illustrated by clustering heatmaps; interestingly, GCN5 overexpression  
278 markedly reversed these changes (Figure 4G and Table S6-S7). Congruently, the cells with both  
279 *Hsf1* KD and GCN5 overexpression were more closely correlated with the control cells than the  
280 *Hsf1*-KD cells, in terms of gene expression (Figure 4H). These findings highlight a key role of  
281 GCN5 in the HSF1-mediated transcription under non-stressed conditions. In line with its  
282 regulation of c-MYC, RNA-seq revealed that *Hsf1* KD altered the expression of an array of  
283 known c-MYC target genes, which was reversed by GCN5 overexpression (Figure S4D).  
284 Importantly, these RNA-seq findings were further validated by qRT-PCR (Figure S4E).

285  
286 Next, we asked how many of these differentially expressed genes (DEGs) are c-MYC target  
287 genes. Our studies show that approximately 92% (2,687 out of 2,909) of those DEGs identified  
288 by RNA-seq are c-MYC target genes; moreover, GCN5 overexpression rescued the expression  
289 of nearly 40% of those 2,687 genes to varying degrees (Figure 4I), highlighting an important role  
290 of GCN5 in the specific regulation of c-MYC by HSF1.

291  
292 Of interest, the differentially expressed c-MYC target genes following *Hsf1* KD play key roles in  
293 proteome homeostasis. Particularly, genes involved in the ribosome, ribosome biogenesis,  
294 proteasome and chaperone pathways are down-regulated; by contrast, genes involved in the  
295 lysosome and autophagy pathways, are up-regulated (Figures 4J and 4K). This gene up-  
296 regulation is not surprising, as c-MYC has been known to mediate transcriptional repression as  
297 well<sup>38</sup>. Whereas *Hsf1* KD altered the expression of chaperones that are constitutively expressed,

298 these changes were reversed by GCN5 overexpression (Figure 4K), in line with a c-MYC-  
299 dependent mechanism. By contrast, c-MYC exhibited no or only low occupancy at the promoters  
300 of classic stress-inducible *Hsp* genes, including *Hspb1/Hsp25* and *Hspa1a/Hsp72* (Figure S4F).  
301 Compared to their constitutive cognates, their expression is either low or undetectable under non-  
302 stressed conditions (Figure S4F), as expected. Importantly, the diminished *Hspb1* expression,  
303 due to *Hsf1* KD, could not be rescued by GCN5 overexpression (Figure S4F), suggesting a c-  
304 MYC-independent, HSF1-dependent mechanism. In further support of our findings,  
305 approximately 74% of the DEGs following *Hsf1* KD in our MEFs are also differentially  
306 expressed in human medulloblastoma cells following *c-MYC* KD<sup>39</sup> (Figure S4G). Collectively,  
307 these findings uncover a genome-wide impact of HSF1 on the c-MYC-mediated transcriptional  
308 program.

309

### 310 **HSF1 directly recruits GCN5 to c-MYC**

311 Given the critical role of GCN5 in HSF1-mediated c-MYC regulation, we asked whether HSF1  
312 influences the GCN5 recruitment to c-MYC. When overexpressed in HEK293T cells, FLAG-  
313 HSF1 was co-IPed with V5-GCN5 (Figure 5A). Although this finding suggests a direct  
314 recruitment of GCN5 by HSF1, it remains possible that HSF1 promotes c-MYC-GCN5  
315 interactions indirectly. To distinguish these two possibilities, *in vitro* pull-down assays were  
316 performed using recombinant proteins. Compared to recombinant EHMT2 controls, a histone  
317 methyltransferase<sup>40</sup>, recombinant HSF1 proteins directly pulled down recombinant GCN5  
318 proteins (Figure S5A), in support of a direct recruitment. This finding predicts that HSF1  
319 deficiency would diminish the GCN5 association with c-MYC. Congruently, PLA indicated a  
320 reduced interaction between endogenous c-MYC and GCN5 in HeLa cells following *HSF1* KD

321 (Figure 5B). Moreover, in MEFs *Hsf1* KD also impaired c-MYC-GCN5 association (Figure 5C).  
322 Conversely, HSF1 overexpression heightened their association (Figure S5B). Thus, these  
323 findings support a direct recruitment of GCN5 by HSF1 to c-MYC.

324

### 325 **HSF1 couples c-MYC and GCN5 via its C-terminal AD**

326 Next, we embarked on elucidating the interactions among HSF1, c-MYC, and GCN5. To  
327 delineate the c-MYC binding sites on HSF1, we utilized a synthetic HSF1 peptide library,  
328 comprising 22 non-overlapping peptides (24 amino acids each), as described in our previous  
329 publication<sup>20</sup>. After screening for the binding of recombinant c-MYC proteins *in vitro*, three  
330 HSF1 peptides, located at the N-terminal DBD (P2, P3) and C-terminal AD (P19) respectively,  
331 displayed evident binding capability (Figure 5D). Considering that HSF1<sup>1-323</sup> was incapable of  
332 activating c-MYC (Figure 1D), we then focused on P19. Revealed by PLA, deletion of the P19  
333 sequence largely abolished the interaction between FLAG-HSF1<sup>324-529</sup> and endogenous c-MYC,  
334 supporting this region as the interacting interface with c-MYC (Figure 5E). Accompanied with  
335 this loss of interaction, P19 deletion abolished the HSF1-mediated c-MYC activation, indicating  
336 the necessity of their physical interaction (Figure 5F).

337

338 A similar screen was performed to delineate the GCN5 binding sites on HSF1. P17, another  
339 region located within the AD, was identified for strong GCN5 binding (Figure 5G). *In situ* PLA  
340 indicated that the P17 region was required for GCN5 binding, as its deletion markedly  
341 diminished FLAG-HSF1<sup>324-529</sup>-GCN5 interactions (Figure 5H). Importantly, overexpression of  
342 HSF1<sup>324-529</sup>, just like HSF1<sup>1-529</sup>, heightened the co-IP of c-MYC and GCN5 (Figure 5I).  
343 Together, our findings support that HSF1, via discrete interactions, couples GCN5 and c-MYC.

344

345 **HSF1 regulates the epigenetic state of c-MYC target loci**

346 Chromatin remodeling is important to transcriptional regulation in eukaryotes. Given the  
347 diminished GCN5 recruitment to c-MYC, we predicted that histone acetylation mediated by  
348 GCN5 would be impaired in *Hsf1*-deficient cells. Consistently, ChIP experiments revealed that  
349 acetylation of H3K9/14, hallmarks of active gene promoters<sup>41,42</sup>, was diminished in *Hsf1*<sup>CKO</sup>  
350 MEFs. Of note, this reduction occurred specifically at c-MYC target loci, but not at non-target  
351 loci (Figure 6A). In light of the importance of recruiting GCN5 to c-MYC, we further predicted  
352 that fusion of the HSF1 C-terminal AD, containing the GCN5 binding site, to c-MYC would  
353 generate a “superactive” c-MYC mutant. Interestingly, this HSF1-c-MYC fusion consistently  
354 resulted in markedly elevated protein expression, likely due to protein stabilization, compared to  
355 the c-MYC wildtype. To better compare their transcriptional activities, less amounts of this  
356 fusion plasmid were transfected into HEK293T cells (Figure 6B). Despite this decreased  
357 expression, the HSF1-c-MYC fusion still demonstrated markedly heightened transcriptional  
358 activity compared to the wildtype, as predicted (Figure 6B).

359

360 In aggregate, these findings support a molecular model, wherein HSF1, by directly recruiting  
361 GCN5 to c-MYC, promotes histone acetylation at the c-MYC target loci specifically, thereby  
362 heightening c-MYC DNA binding and, ultimately, magnifying its transcriptional activity (Figure  
363 6C).

364

365

366



367 **DISCUSSION**

368 Owing to its extensive regulation of the genome, potent oncogenic potential, and prominent role  
369 in pluripotency reprogramming, c-MYC has attracted great attention in biomedical research.  
370 Herein, we report that HSF1, a potent enabler of oncogenesis, specifically potentiates the c-  
371 MYC-mediated transcription. Our studies uncover a previously unrecognized transcription factor  
372 complex comprising both HSF1 and c-MYC/MAX heterodimers. Instead of binding to HSEs,  
373 unexpectedly, within this complex HSF1 directly recruits the histone acetyltransferase GCN5 to  
374 c-MYC via physical interactions. GCN5, in turn, remodels chromatin architecture to stimulate c-  
375 MYC transcriptional activity. Thereby, HSF1 renders c-MYC transcriptionally competent.

376

377 **A conditional, DNA binding-dependent transcription factor complex**

378 Distinct from “constitutive” protein complexes, the assembly of c-MYC-MAX-HSF1 complexes  
379 is “conditional”, mainly contingent upon DNA binding. Although there is a possibility that HSF1  
380 and c-MYC/MAX dimers may co-occupy adjacent genomic DNAs independently, several lines  
381 of evidence collectively refute this as a principal mechanism: 1) if this scenario were true,  
382 preventing HSF1 DNA binding would abolish their co-IP and c-MYC activation. Contrary to this  
383 prediction, HSF1<sup>324-529</sup> mutants lacking the DBD are still able to co-IP with and activate c-MYC;  
384 2) the PLA signals unequivocally denote a direct contact between HSF1 and c-MYC in intact  
385 cells; 3) importantly, the P19 region on HSF1 AD mediates c-MYC interactions; and 4)  
386 compared to E-boxes, HSEs were far less enriched in the c-MYC binding sites. Our data suggest  
387 that monomeric HSF1 is sufficient to associate with c-MYC/MAX, as HSF1<sup>324-529</sup> mutants,  
388 which also lack the trimerization domain, still interacts with c-MYC. Nonetheless, we cannot

389 exclude the possibility that trimeric HSF1 may also bind to c-MYC/MAX dimers especially  
390 under heat shock.

391

392 Furthermore, this conditional, DNA binding-dependent complex differs from the previously  
393 described “enhanceosome”<sup>43</sup>, where individual transcription factors cooperatively bind to their  
394 respective DNA elements. By contrast, while within this complex only c-MYC/MAX dictate the  
395 specificity of DNA binding, HSF1 behaves like an adaptor devoid of DNA binding. In a sense,  
396 this transcription factor complex operates in a “hybrid” mode, fusing the DNA binding capability  
397 of c-MYC/MAX with the transcription coregulatory function of HSF1. Owing to the conditional  
398 nature of this complex, HSF1 would not become limited for its *de facto* transcriptional program,  
399 namely the HSR/PSR, whilst amplifying the c-MYC-mediated transcription. Nonetheless, it  
400 remains elusive how this complex assembly depends on DNA binding. It is possible that DNA  
401 binding may incite conformational changes in c-MYC/MAX dimers, which, in turn, favors the  
402 interaction with HSF1. Further investigations are warranted. Unlike its dependency on DNA  
403 binding at the cellular context, this c-MYC-HSF1 interaction can be readily detected *in vitro*  
404 using recombinant proteins in the absence of DNA binding. This is most likely due to excessive  
405 proteins under *in vitro* conditions, bypassing the requirement for DNA binding. Under  
406 physiological conditions, however, cellular HSF1 and c-MYC proteins are either limited or  
407 unavailable for interaction, making DNA binding a prerequisite for efficient complex assembly.

408

409 It appears that at physiological conditions only part of cellular c-MYC/MAX dimers associate  
410 with HSF1. Of interest, the genomic loci of c-MYC targets regulated by HSF1 are enriched for  
411 histone acetylation, compared to non-HSF1-regulated targets (Figure S6A). Particularly,

412 H3K27ac is a well-known epigenetic mark for active/open chromatin<sup>44</sup>. Consistent with  
413 preferential c-MYC/MAX DNA binding at these genomic loci, the CUT&RUN-seq binding sites  
414 display higher peak signals (Figure S6B). In support of active transcription, these HSF1-  
415 regulated c-MYC target genes are expressed at significantly higher levels (Figure S6C). To date,  
416 two distinct models of c-MYC-mediated transcription have been proposed: a gene selective  
417 activator (initiation) or a universal amplifier (elongation)<sup>45</sup>. Of note, our studies were conducted  
418 under physiological conditions without c-MYC overexpression. While our findings do not  
419 distinguish these two models, they collectively support a scenario wherein cellular c-MYC/MAX  
420 dimers preferentially bind to genomic loci possessing more open chromatin structures, which is  
421 ensued by the recruitment of HSF1 and GCN5 that stabilizes DNA binding and, ultimately, leads  
422 to enhanced transcriptional initiation or elongation. By forming this hybrid transcription factor  
423 complex, HSF1 not only empowers the c-MYC-mediated transcription but also greatly expands  
424 its own biological impacts, far beyond protein quality control.

425

#### 426 **HSF1 dictates two distinct c-MYC activation states**

427 Of interest, the ability of HSF1<sup>324-529</sup> to directly recruit GCN5 may account for the effectiveness  
428 of HSF1 AD in newly emerged CRISPR activation systems<sup>46</sup>. Despite its necessity for the HSF1-  
429 mediated c-MYC activation, some GCN5 still associates with c-MYC even in the absence of  
430 *Hsf1*. Thus, HSF1 only augments the GCN5 association. This is crucial, considering that *c-MYC*  
431 is an essential gene. Therefore, *Hsf1*-deficient cells would retain a diminished c-MYC activity  
432 that is still sufficient to sustain viability. It remains to be determined whether c-MYC *per se*  
433 could recruit GCN5 independently. Conceptually, at the cellular level c-MYC activity could be  
434 retained at two distinct states, primary and advanced (Figure 6D). HSF1 controls the switch

435 between these two. By engaging extra GCN5, HSF1 empowers c-MYC to function at its full  
436 capacity, which may be required for certain physiological and pathological conditions beyond  
437 simple viability maintenance.

438

439 HSF1 is dispensable for the viability of non-transformed cells, suggesting that the primary state  
440 of c-MYC activation is sufficient for viability. It further implies that the c-MYC-bound genes in  
441 *Hsf1<sup>CKO</sup>* cells may represent the core targets critical for life. In line with this notion, these 6,927  
442 genes are enriched for common essential genes defined by Project Achilles and display higher  
443 probabilities of dependency in general (Figures S6D and S6E). Congruently, the gene ontology  
444 enrichment analysis reveal that these target genes engage in many essential biological processes,  
445 including ribosome biogenesis and mRNA processing (Figure S6F).

446

#### 447 **HSF1 is a guardian of cellular proteome**

448 It has been widely recognized that under stressed conditions HSF1 is crucial to the maintenance  
449 of proteomic stability through direct induction of *HSP* gene transcription. This action mainly  
450 protects protein quality. Now, our studies reveal that HSF1 can control protein quantity as well at  
451 both the synthesis and degradation phase. Through c-MYC, HSF1 transcriptionally regulates  
452 ribosomes, proteasomes, and lysosomes. Intriguingly, HSF1 governs not only translation  
453 capacity via ribosomes, indicated in this study, but also translation efficiency via mTORC1, as  
454 reported previously<sup>31</sup>.

455

456 Another interesting finding is the regulation of constitutively expressed *HSPs* by HSF1. Apart  
457 from its essential role in determining the expression of stress-inducible *Hsp* genes, namely the

458 HSR/PSR, HSF1 also augments the expression of constitutively expressed *Hsp* genes via c-  
459 MYC. Thus, by overseeing every major aspect of proteome homeostasis, HSF1 acts as a  
460 guardian of cellular proteome.

461

## 462 **Implications in stress, cancer, and stem cell biology**

463 Canonically, the HSR/PSR is characterized by the specific binding of HSF1 trimers to HSEs  
464 located at gene promoters and subsequent transcriptional induction of these target genes, many of  
465 which encodes HSPs. Although HSF1 can regulate *non-HSP* genes, including the target genes of  
466 E2F<sup>47,48</sup>, this regulation is also reliant on the HSE binding of HSF1. Apparently, this HSF1-c-  
467 MYC complex does not follow this classic definition. Independently of DNA binding, HSF1 can  
468 activate the much broader c-MYC-mediated transcriptional program (Figure 6E), exerting more  
469 profound impacts on cellular physiology than previously thought. Of note, under non-stressed  
470 conditions most HSF1 remains repressed and inactive; however, some HSF1 appears to escape  
471 this repression and potentiate the c-MYC-mediated transcription, independently of HSE binding  
472 (Figure 6E). Thus, even in the absence of proteotoxic stress HSF1 remains transcriptionally  
473 active to impact cellular physiology. Moreover, the versatility of HSF1 to direct distinct  
474 transcriptional programs, depending on different complexes it forms, exemplifies a new mode of  
475 action of transcription factors.

476

477 Ample evidence has pinpointed HSF1 as a generic pro-oncogenic factor, via multifaceted  
478 mechanisms<sup>16-21</sup>. Of note, in non-transformed MEFs *Hsf1* deficiency affected the expression of  
479 roughly 12% of the c-MYC target genes, although it is likely underestimated due to incomplete  
480 *Hsf1* KD. This finding suggests that only part of cellular c-MYC is associated with HSF1 under

481 this condition. Likely, in non-transformed cells HSF1 is largely inaccessible, partly due to its  
482 repressive mechanisms, to activate c-MYC. However, in human cancers HSF1 is notably  
483 overexpressed<sup>14,49</sup>. This increased quantity would render a considerable portion of cellular c-  
484 MYC transcriptionally competent, thereby promoting malignancy. In support of this notion,  
485 approximately 80% of HSF1-bound genes, defined by HSF1 ChIP-seq<sup>49</sup>, in human cancers are c-  
486 MYC targets (Figure S6G). Given that in cancerous cells HSF1 becomes constitutively  
487 active<sup>14,50</sup>, the rest 20% likely comprise canonical HSF1 targets. Conversely, without HSF1, cells  
488 only possess basic c-MYC activity that is sufficient for viability but inadequate for malignant  
489 transformation, thus adopting a “tumor-resistant” cellular state. This concept may have  
490 implications in anti-cancer therapies. Owing to its essentiality to viability, directly targeting c-  
491 MYC likely inflicts undesirable side effects. Instead, targeting HSF1 may abate c-MYC activity  
492 to a level that is adequate to sustain viability, but unable to support malignancy. Excitingly,  
493 novel HSF1 inhibitors showing potent anti-cancer effects have been developed in recent  
494 years<sup>51,52</sup>.

495

496 Lastly, given the importance of c-MYC to pluripotency reprogramming, it is plausible to  
497 postulate that this HSF1-mediated c-MYC activation may impact stemness. Although HSF1 has  
498 been implicated in maintaining cancer stem cells<sup>53,54</sup>, its role in normal stem cell biology remains  
499 to be determined.

500

501

502

503

## 504 **EXPERIMENTAL MATERIALS AND METHODS**

### 505 **Cell culture and reagents**

506 HeLa cells were purchased from ATCC and HEK293T cells were purchased from GE  
507 Dharmacon. Both were recently authenticated by ATCC. Immortalized *Rosa26-CreER<sup>T2</sup>; Hsf1<sup>fl/fl</sup>*  
508 MEFs (male) were described previously<sup>31</sup>. To delete *Hsf1*, these MEFs were pre-treated with  
509 ethanol or 1 mM (Z)-4-Hydroxytamoxifen (4-OHT) for 7 days. A2058 cells stably expressing  
510 LacZ or FLAG-HSF1 were described previously<sup>16</sup>. All cell cultures were maintained in DMEM  
511 supplemented with 10% HyClone bovine growth serum and 1% penicillin–streptomycin (Gibco).  
512 Cells were maintained in an incubator with 5% CO<sub>2</sub> at 37 °C. All cell lines were routinely tested  
513 for mycoplasma contamination using MycoAlert Mycoplasma Detection kits.

514

515 Recombinant proteins were all purchased commercially, including c-MYC/MAX complexes  
516 (Cat#81087, Active Motif Inc.), GST (Cat#G52-30U, SignalChem Biotech), GST-HSF1  
517 (Cat#H25-30G, SignalChem Biotech), His-HSF1 (Cat#ADI-SPP-900, Enzo Life Sciences Inc.),  
518 GST-c-MYC (Cat#H00004609-P01, Abnova Corp.), His-c-MYC (Cat#230-00580-100,  
519 RayBiotech, Inc.), His-GST (Cat#12-523, Sigma-Aldrich Inc.), FLAG-EHMT2 (Cat#31410,  
520 Active Motif Inc.), and FLAG-GCN5 (Cat#31591, Active Motif Inc.).

521

### 522 **Plasmids and generated stable cells**

523 pBabe-HSF1-FLAG was a gift from Robert Kingston (Addgene plasmid#1948). pMSCV-HA-  
524 cMYCT58A was a gift from Scott Lowe (Addgene plasmid#18773). pCherry-HSP90alpha was a  
525 gift from Didier Picard (Addgene plasmid#108222). pCDNA3-2xHA-c-MYC was a gift from  
526 Martine Roussel (Addgene plasmid#74161). pLX304-LacZ-V5 was a gift from William Hahn

527 (Addgene plasmid#42560). pBabe-LacZ, pBabe-HSF1<sup>1-323</sup>, and pBabe-HSF1<sup>324-529</sup> were  
528 described previously<sup>20</sup>.  
529  
530 pLX304-MAX-V5 (HsCD00440967) and pDONR221-GCN5 (HsCD00829789) vectors were  
531 purchased from DNASU plasmid depository. pLX304-LacZ-V5 and pLX304-GCN5-V5 vectors  
532 were co-transfected with packaging vector (delta VPR) and an envelope vector (VSV-G) into  
533 HEK293T packaging cells using TurboFect transfection reagent (Cat#R0531, ThermoFisher).  
534 MEF cells were infected with produced lentivirus in the presence of polybrene (10 µg/mL). After  
535 incubation for 3 days, cells were selected with 1 µg/mL blasticidin for 7 days.

536

#### 537 **Transfection and c-MYC dual reporter assays**

538 All plasmids were transfected with TurboFect transfection reagents. HEK293T cells were co-  
539 transfected with pMYC-SEAP and pCMV-Gaussia luciferase (GLuc) reporter plasmids, along  
540 with various indicated plasmids. After 48 hours, reporter activities in culture media were  
541 measured. SEAP and GLuc activities in culture supernatants were quantitated using a  
542 NovaBright Phospha-Light EXP Assay Kit (Cat#N10577, ThermoFisher Scientific) for SEAP  
543 and a Pierce<sup>TM</sup> Gaussia Luciferase Glow Assay Kit (Cat#16160, ThermoFisher Scientific),  
544 respectively. Luminescence signals were measured by a CLARIOstar microplate reader (BMG  
545 LABTECH). SEAP activities were normalized against GLuc activities.

546

#### 547 **siRNA and shRNA knockdown**

548 siRNAs were transfected at 10nM final concentration, except *c-Myc*-targeting siRNAs (50 nM  
549 final concentration), using Mission<sup>®</sup> siRNA transfection reagent or jetPRIME<sup>®</sup> transfection



550 reagent. siRNAs were purchased commercially, including non-targeting control siRNAs (Cat#D-  
551 001210-02-05, Horizon Discovery Ltd.), *Hsfl*-targeting siRNAs (Cat#SASI\_Mm01\_00023056  
552 and \_00023057, Signa-Aldrich), *HSF1*-targeting siRNAs (Cat# SASI\_Hs01\_00067735 and  
553 \_Hs02\_00339745, Signa-Aldrich), *c-Myc*-targeting siRNAs (SASI\_Mm01\_00157474 and  
554 \_00157475, Signa-Aldrich), *Gcn5*-targeting siRNAs (Cat# SASI\_Mm01\_00159517 and  
555 Mm02\_00289578, Signa-Aldrich), and GCN5-targeting siRNAs (Cat# SASI\_Hs01\_00050954  
556 and \_00050955, Signa-Aldrich).

557

### 558 **Quantitative real-time PCR**

559 Total RNAs were isolated using RNA STAT-60™ reagent (Cat#CS110, Tel Test Inc.), and 1 µg  
560 RNAs were used for reverse transcription using iScript™ cDNA Synthesis Kit (Cat#1708891,  
561 Bio-Rad). Equal amounts of cDNA were used for quantitative RCR reaction using a DyNAmo  
562 SYBR Green qPCR kit (Cat#F410L, ThermoFisher Scientific). Signals were detected by an  
563 Agilent Mx3000P qPCR System (Agilent Genomics). ACTB was used as the internal control.  
564 The sequences of individual primers for each gene are listed in Table S8.

565

### 566 **Immunoblotting and Immunoprecipitation**

567 Whole-cell protein extracts were prepared in cold cell-lysis buffer (100 mM NaCl, 30 mM Tris-  
568 HCl pH 7.6, 1% Triton X-100, 20 mM sodium fluoride, 1mM EDTA, 1mM sodium  
569 orthovanadate, and 1x Halt™ protease inhibitor cocktail). Proteins were transferred to  
570 nitrocellulose membranes. Following incubation with the blocking buffer (5% non-fat milk in 1x  
571 TBS-T) for 1 hour at RT, membranes were incubated with primary antibodies (1:1,000 dilution  
572 in the blocking buffer) overnight at 4 °C. After washing with 1xTBS-T for 3 times, membranes

573 were incubated with peroxidase-conjugated secondary antibodies (1: 5000 dilution in the  
574 blocking buffer) at RT for 1 hr. Signals were detected using SuperSignal West chemiluminescent  
575 substrates (Cat#34578 or #34095, ThermoFisher Scientific). For Co-IP, 1 mg whole cell lysates  
576 were incubated with primary antibodies at 4 °C overnight. Either normal rabbit IgG were used as  
577 the negative controls. Protein G magnetic beads (Cat#88847, ThermoFisher Scientific) were used  
578 to precipitate primary Abs. After washing with the lysis buffer for 3 times, beads were boiled in  
579 1x loading buffer for 5 min before loading on SDS-PAGE.

580

### 581 ***In vitro* Lumit™ Immunoassays**

582 The storage buffers of recombinant proteins were first changed to 1x Lumit™ Immunoassay  
583 buffer C using Zeba™ Spin desalting columns (7K MWCO, Cat#89883, ThermoFisher  
584 Scientific Inc.). For each reaction, 10 ng recombinant c-MYC/MAX complexes (Cat#81087,  
585 Active Motif Inc.) were incubated at 1:1 molar ratio with either recombinant GST (Cat#G52-  
586 30U, SignalChem Inc.) or GST-HSF1 proteins (Cat#H25-30G, SignalChem Inc) in 50 µl 1x  
587 Lumit™ Immunoassay buffer C at RT for 1 hr with 200rpm shaking. Then, 50 µl 1x Lumit™  
588 Immunoassay buffer C containing 150 ng primary antibodies, including a rabbit anti-FLAG  
589 antibody (Cat#14793S, Cell Signaling Technology) in combination with a mouse anti-GST  
590 (26H1) antibody (Cat# 2624S, Cell Signaling Technology) for c-MYC-HSF1 interactions, or a  
591 mouse anti-FLAG (9A3) antibody (Cat#8146S, Cell Signaling Technology) in combination with  
592 a rabbit anti-His tag (D3I1O) antibody (Cat#12698S, Cell Signaling Technology) for c-MYC-  
593 MAX interactions, and 150 ng Lumit™ secondary antibodies was added to each well and  
594 incubated at RT for 90 min. Following the incubation, 25 µl 1x Lumit™ Immunoassay buffer C  
595 containing Lumit™ substrate C (1:12.5 dilution) in was added to each well and incubated for 2

596 min with 400 rpm shaking. The luminescence signals were measured by a SpectraMax iD5  
597 microplate reader (Molecular Device, Inc.).

598

### 599 **c-MYC DNA binding assay**

600 c-MYC DNA binding was measured by TransAM™ c-MYC transcription factor assay kits (Cat#  
601 43396, Active Motif). The nuclei of MEFs were prepared by NE-PER™ Nuclear and  
602 Cytoplasmic extraction reagents (Cat#78835, ThermoFisher Scientific, Inc.). Isolated nuclei  
603 were lysed in the complete lysis buffer to extract nuclear proteins. Each well was incubated with  
604 50 µg nuclear extracts with and without the competition of wild-type E-box oligonucleotides.  
605 The detection of DNA-bound c-MYC followed the manufacturer's instructions.

606

607 The microplates from the TransAM™ c-MYC transcription factor assay kit, on which consensus  
608 E-box oligonucleotides have been immobilized, were adapted to measure the DNA binding of  
609 recombinant c-MYC/MAX proteins. First, 10 ng recombinant c-MYC/MAX complexes were  
610 incubated with either recombinant GST or GST-HSF1 proteins (1:1 molar ratio) in 50 µl 1x  
611 DNA binding buffer (10 mM Tris, 50 mM KCl, pH 7.5) at RT for 1 hr with rotation. Following  
612 the incubation, the mixtures were loaded on the microplates and incubated at RT for 30 min with  
613 200rpm shaking. Then, 50 µl 1x DNA binding buffer containing anti-FLAG antibody HRP  
614 conjugates (1:1000 dilution) was added to each well and incubated at RT for 15 min with  
615 200rpm shaking. After 5 times of washing with 1x DNA binding buffer, 100 µl 1-Step Ultra  
616 TMB-ELISA Substrate Solution (Cat#34029, ThermoFisher Scientific Inc.) was added to each  
617 well for signal development.

618

619 ***In vitro* recombinant protein pull-down assay**

620 400ng recombinant His-HSF1 (Cat#ADI-SPP-900, Enzo Life Sciences Inc.), FLAG-GCN5  
621 (Cat#31591, Active Motif), FLAG-EHMT2 (Cat#31410, Active Motif), GST-MYC  
622 (Cat#H00004609-P01, Abnova) or His-GST (Cat#12-523, Millipore Sigma) were diluted in 400  
623  $\mu$ L reaction buffer (25mM Tris-HCL 100mM NaCl, 0.5% Triton X-100, pH7.5), followed by  
624 incubation for 3 hours at 4 °C. For the GST pulldown, glutathione magnetic beads (Cat#78601,  
625 ThermoFisher Scientific) were added and incubated at RT for 2 hours. For the other pulldowns,  
626 either rabbit anti-HSF1 (H-311) (Cat#sc-9144, Santa Cruz Biotechnology) or rabbit anti-FLAG  
627 antibodies (Cat#14793S, Cell Signaling Technology) were added to the mixtures and incubated  
628 for 3 hours at 4 °C, followed by incubation with protein G magnetic beads for 2 hours at 4 °C.  
629 Magnetic beads were collected and washed with reaction buffer, followed by protein elution  
630 (boiled in 1x sample buffer) and western blotting.

631

632 **Proximity Ligation Assay**

633 Cells were fixed with 4% formaldehyde in PBS for 15 min at RT. After blocking with 5% goat  
634 or horse serum in PBS with 0.3% Triton X-100, cells were incubated with a pair of indicated  
635 rabbit, mouse, or goat primary antibodies (1:100 diluted in the blocking buffer) overnight at  
636 4 °C. Following incubation with Duolink™ PLA anti-rabbit Plus, anti-mouse Minus, or anti-goat  
637 Minus probes (Cat#DUO92002, DUO92004, and DUO92006, Sigma-Aldrich) at 37 °C for 1  
638 hour, ligation, rolling circle amplification, and detection were performed using Duolink™ In Situ  
639 Detection Reagents Red (Cat#DUO92008, Sigma-Aldrich). Nuclei were stained with Hoechst  
640 33342. Signals were visualized using a Zeiss LSM780 confocal microscope. For brightfield

641 PLA, detection was performed using Duolink™ In Situ Detection Reagents Brightfield  
642 (Cat#DUO92012, Sigma-Aldrich).  
643  
644 For the c-MYC-gDNA PLA, a rabbit anti-c-MYC (D3N8F) antibody (Cat#13987S, Cell  
645 Signaling Technology) was combined with a mouse anti-dsDNA (HYB331-01) antibody  
646 (Cat#sc-58749, Santa Cruz Biotechnology). For the c-MYC-HSF1 PLA, a rabbit anti-c-MYC  
647 (D3N8F) antibody (Cat#13987S, Cell Signaling Technology) was combined with a mouse anti-  
648 HSF1 (E-4) antibody (Cat#sc-17757, Santa Cruz Biotechnology). For the c-MYC-GCN5 PLA, a  
649 goat anti-c-MYC antibody (Cat#AF3696, R&D Systems) was combined with a rabbit anti-GCN5  
650 (C26A10) antibody (Cat#3305S, Cell Signaling Technology). For the FLAG-HSF1-c-MYC  
651 PLA, a mouse anti-FLAG (9A3) antibody (Cat#8146S, Cell Signaling Technology) was  
652 combined with a rabbit anti-c-MYC (D3N8F) antibody (Cat#13987S, Cell Signaling  
653 Technology). For the FLAG-HSF1-GCN5 PLA, a rabbit anti-GCN5 (C26A10) antibody  
654 (Cat#3305S, Cell Signaling Technology) was combined with a mouse a mouse anti-FLAG (9A3)  
655 antibody (Cat#8146S, Cell Signaling Technology).

656

### 657 **Chromatin immunoprecipitation assay**

658 The ChIP assay was performed using a SimpleChIP® Enzymatic Chromatin IP Kit (Cat#9003,  
659 Cell Signaling Technology) following the manufacturer's instruction. Briefly,  $\sim 4 \times 10^6$  cells were  
660 fixed with 1% formaldehyde and quenched in glycine. Cells were lysed in extraction buffer to  
661 obtain nuclear pellet, followed by incubation with micrococcal nuclease to fragment genomic  
662 DNAs. Further sonication is performed to completely lyse the nuclei. Sheared DNAs were  
663 immunoprecipitated by normal rabbit IgG (Cat#10500C, ThermoFisher Scientific), rabbit c-

664 MYC (D3N8F) monoclonal Abs (Cat#13987, Cell Signaling Technology), or rabbit Acetyl-  
665 Histone H3(Lys9/Lys14) Abs (Cat#9677, Cell Signaling Technology), followed by quantitative  
666 real-time PCR analysis. The total genomic DNAs immunoprecipitated by c-MYC Abs were  
667 measured using a DNA quantification fluorometric kit (Cat#K539, BioVision), following the  
668 manufacturer's instruction. The sequences of oligos used for ChIP-qPCR are listed in Table S8.  
669

#### 670 **Detection of MYC/GCN5 binding by ELISA**

671 The HSF1 peptide library was synthesized by GenScript Custom Peptide Synthesis Service. The  
672 amino acid sequences of individual peptides are listed in our previous publication<sup>20</sup>. Peptides  
673 were dissolved in 0.01N NaOH to make 1mM stocks. For detection of c-MYC/GCN5 binding  
674 sites, 20 mM HSF1 peptides in 100  $\mu$ L PBS were coated on an ELISA microplate at 4  $^{\circ}$ C  
675 overnight. The plates were blocked with 1%BSA in PBS at RT for 30 min, followed by  
676 incubation with 20 ng recombinant c-MYC/MAX complexes or GCN5 proteins in 100  $\mu$ L PBS-  
677 T buffer per well at 4  $^{\circ}$ C overnight. After washing with PBST for 3 times, each well was  
678 incubated with Rabbit anti-c-MYC (D3N8F) monoclonal Abs (Cat#13987, Cell Signaling  
679 Technology) or Rabbit anti-GCN5 monoclonal Abs (Cat#3305, Cell Signaling Technology)  
680 (1:1000 diluted in the blocking buffer) at RT for 3 hours. Following washing, each well was  
681 incubated with anti-Rabbit IgG (H+L)-HRP conjugates (1:5000 diluted in the blocking buffer) at  
682 RT for 1 hour. Signals were developed using the 1-Step Ultra TMB-ELISA Substrate Solution.

683

#### 684 **RNA-seq and data analysis**

685 MEFs stably expressing LacZ or V5-GCN5 were transfected with control or *Hsfl*-targeting  
686 siRNAs for 2 days. Total RNAs were extracted from  $5 \times 10^5$  MEFs, triplicates each experimental

687 group, using Direct-zol RNA miniprep plus kit (Cat#R2073, Zymo Research). 1.5  $\mu$ l of ERCC  
688 ExFold RNA spike-in mix 1 (1: 10 dilution, Cat#4456739, ThermoFisher Scientific Inc.) was  
689 added to each siControl RNA sample and 1.5  $\mu$ l of mix 2 (1:10 dilution) was added to each  
690 *siHsf1* RNA sample. Libraries were prepared with rRNA depletion and sequenced with an  
691 Illumina HiSeq PE150 platform. Filtered raw data were mapped to the reference genome using  
692 HISAT2<sup>55</sup>. RUVseq package was used to normalize the data<sup>56</sup>. DESeq2 was used to analyze the  
693 DEG of samples<sup>57</sup> ( $\text{padj} \leq 0.05$   $|\log_2\text{FoldChange}| \geq 0.0$  are set as threshold). Hierarchical  
694 clustering was performed using the FPKMs of transcripts. Pathway enrichment analyses were  
695 performed using Enrichr<sup>58</sup>.

696

#### 697 **CUT&RUN-seq and ChIP-seq**

698 Cut&Run experiments were performed using a CUTANA™ ChIC/CUT&RUN kit (Cat# 14-  
699 1048, EpiCypher) according to the manufacturer's instructions. Briefly, proliferating MEFs were  
700 crosslinked with 1% formaldehyde in PBS for 1 min on culture plates. After quenching with  
701 glycine, cells were scraped off the plates and counted.  $5 \times 10^5$  crosslinked cells were used for each  
702 sample. For the IgG control, both *Hsf1*<sup>WT</sup> and *Hsf1*<sup>CKO</sup> MEFs were mixed at a 1:1 ratio and  
703 incubated with rabbit IgG negative control antibodies. For the experimental groups, either  
704 *Hsf1*<sup>WT</sup> or *Hsf1*<sup>CKO</sup> MEFs (two biological replicates each group) were incubated with rabbit anti-  
705 c-MYC (D3N8F) monoclonal Abs (Cat#13987, Cell Signaling Technology). Of note, wash, cell  
706 permeabilization, and antibody buffers were all supplemented with 1% Triton X-100 and 0.05%  
707 SDS. Reversing cross-links was achieved by adding 0.8  $\mu$ l of 10% SDS and 1  $\mu$ l of 20  $\mu$ g/ $\mu$ l  
708 Proteinase K to each sample and incubated at 55°C overnight. Following purification, 0.5 ng *E.*  
709 *coli* spike-in DNAs were added to each eluted DNA sample. Total 10 ng DNAs each sample

710 were used to generate sequencing libraries using a NEBNext® Ultra™ II DNA Library Prep Kit  
711 for Illumina (Cat#E7645, New England Biolabs Inc.). The clustering of indexed samples was  
712 performed using a TruSeq PE Cluster kit v3-cBot-HS (Cat#PE-401-3001, Illumina, Inc.). The  
713 library preparations were sequenced on an Illumina HiSeq 2500 system to generate 150 bp  
714 paired-end reads. The sequencing data were analyzed using the EpiCypher Cut&Run pipeline  
715 (Basepair Inc.). Briefly, following trimming, the raw sequencing reads were aligned to the mouse  
716 (GRCm38/mm10) and *E. coli* (strain K-12) reference genomes respectively using Bowtie2<sup>59</sup>.  
717 Subsequently, CUT&RUN peaks were called using SEACR<sup>60</sup> with the stringent and spike-in  
718 normalization settings. As a comparison, CUT&RUN peaks were also called using MACS2<sup>61</sup>,  
719 which results in much fewer peaks (5075 for WT and 2198 for CKO). The motif enrichment  
720 analyses were performed using AME<sup>62</sup>.

721

722 The ChIP-seq experiments and data analyses were done through a contract with the Active Motif  
723 Epigenetic Services (Active Motif, Inc.). Briefly, equal amounts of sonicated chromatin from  
724 two biological replicates were used for ChIP using the same anti-c-MYC antibodies. Input  
725 chromatin was sequenced as the control. Paired-end reads were aligned to the mouse  
726 (GRCm38/mm10) reference genome using Bowtie2 and ChIP-seq peaks were called using  
727 MACS2.

728

## 729 **Statistical analyses**

730 Statistical analyses were performed using Prism GraphPad 8.0 (GraphPad Software). The  
731 statistical significance is defined as: \* $p < 0.05$ , \*\* $p < 0.01$ ; \*\*\* $p < 0.001$ ; n.s.: not significant. For *in*



732 *vitro* experiments, sample size required was not determined a priori. The experiments were not  
733 randomized.

734

735

## 736 **ACKNOWLEDGMENTS**

737 We would like to thank the Optical Microscopy and Image Analysis lab (OMAL) for their  
738 assistance with the confocal microscopy studies. This work was supported by the grant from  
739 National Institutes of Health (NIH), United States to C.D. (1DP2OD007070) and by the  
740 Intramural Research Program of the NIH, National Cancer Institute, Center for Cancer Research.

741 The content of this publication does not necessarily reflect the views or policies of the  
742 Department of Health and Human Services, nor does mention of trade names, commercial  
743 products, or organizations imply endorsement by the U.S. government. **Author**

744 **contributions:** M. X., L. L., K-H. C., B. R., S. D., K-H. S., Z. T., and C. D. designed and  
745 conducted the experiments. C.D. conceptualized and supervised this study and analyzed the  
746 results. M.X. and C.D. wrote the manuscript. **Competing interests:** The authors declare that  
747 they have no competing interests.

748

749

750

751

752

753

754

755 **REFERENCE**

- 756 1. Dang, C.V. MYC on the path to cancer. *Cell* **149**, 22-35 (2012).
- 757 2. Vita, M. & Henriksson, M. The Myc oncoprotein as a therapeutic target for human cancer.  
758 *Semin Cancer Biol* **16**, 318-30 (2006).
- 759 3. Kuzyk, A. & Mai, S. c-MYC-induced genomic instability. *Cold Spring Harb Perspect Med*  
760 **4**, a014373 (2014).
- 761 4. Madden, S.K., de Araujo, A.D., Gerhardt, M., Fairlie, D.P. & Mason, J.M. Taking the Myc  
762 out of cancer: toward therapeutic strategies to directly inhibit c-Myc. *Mol Cancer* **20**, 3  
763 (2021).
- 764 5. Okita, K. & Yamanaka, S. Induced pluripotent stem cells: opportunities and challenges.  
765 *Philos Trans R Soc Lond B Biol Sci* **366**, 2198-207 (2011).
- 766 6. Chappell, J. & Dalton, S. Roles for MYC in the establishment and maintenance of  
767 pluripotency. *Cold Spring Harb Perspect Med* **3**, a014381 (2013).
- 768 7. Martinez, E. et al. Human STAGA complex is a chromatin-acetylating transcription  
769 coactivator that interacts with pre-mRNA splicing and DNA damage-binding factors in vivo.  
770 *Mol Cell Biol* **21**, 6782-95 (2001).
- 771 8. Liu, X., Tesfai, J., Evrard, Y.A., Dent, S.Y. & Martinez, E. c-Myc transformation domain  
772 recruits the human STAGA complex and requires TRRAP and GCN5 acetylase activity for  
773 transcription activation. *J Biol Chem* **278**, 20405-12 (2003).
- 774 9. Jin, Q. et al. Distinct roles of GCN5/PCAF-mediated H3K9ac and CBP/p300-mediated  
775 H3K18/27ac in nuclear receptor transactivation. *EMBO J* **30**, 249-62 (2011).
- 776 10. Cieniewicz, A.M. et al. The bromodomain of Gcn5 regulates site specificity of lysine  
777 acetylation on histone H3. *Mol Cell Proteomics* **13**, 2896-910 (2014).

- 778 11. Eberharter, A. & Becker, P.B. Histone acetylation: a switch between repressive and  
779 permissive chromatin. Second in review series on chromatin dynamics. *EMBO Rep* **3**, 224-9  
780 (2002).
- 781 12. Morimoto, R.I. The heat shock response: systems biology of proteotoxic stress in aging and  
782 disease. *Cold Spring Harb Symp Quant Biol* **76**, 91-9 (2011).
- 783 13. Gomez-Pastor, R., Burchfiel, E.T. & Thiele, D.J. Regulation of heat shock transcription  
784 factors and their roles in physiology and disease. *Nat Rev Mol Cell Biol* **19**, 4-19 (2018).
- 785 14. Dai, C. & Sampson, S.B. HSF1: Guardian of Proteostasis in Cancer. *Trends Cell Biol* **26**, 17-  
786 28 (2016).
- 787 15. Prince, T.L. et al. HSF1: Primary Factor in Molecular Chaperone Expression and a Major  
788 Contributor to Cancer Morbidity. *Cells* **9**(2020).
- 789 16. Tang, Z. et al. MEK guards proteome stability and inhibits tumor-suppressive  
790 amyloidogenesis via HSF1. *Cell* **160**, 729-744 (2015).
- 791 17. Meng, L., Gabai, V.L. & Sherman, M.Y. Heat-shock transcription factor HSF1 has a critical  
792 role in human epidermal growth factor receptor-2-induced cellular transformation and  
793 tumorigenesis. *Oncogene* **29**, 5204-13 (2010).
- 794 18. Khaleque, M.A. et al. Induction of heat shock proteins by heregulin beta1 leads to protection  
795 from apoptosis and anchorage-independent growth. *Oncogene* **24**, 6564-73 (2005).
- 796 19. Jin, X., Moskophidis, D. & Mivechi, N.F. Heat shock transcription factor 1 is a key  
797 determinant of HCC development by regulating hepatic steatosis and metabolic syndrome.  
798 *Cell Metab* **14**, 91-103 (2011).
- 799 20. Su, K.H., Dai, S., Tang, Z., Xu, M. & Dai, C. Heat Shock Factor 1 Is a Direct Antagonist of  
800 AMP-Activated Protein Kinase. *Mol Cell* **76**, 546-561 e8 (2019).

- 801 21. Yang, T. et al. Phosphorylation of HSF1 by PIM2 Induces PD-L1 Expression and Promotes  
802 Tumor Growth in Breast Cancer. *Cancer Res* **79**, 5233-5244 (2019).
- 803 22. Davis, A.C., Wims, M., Spotts, G.D., Hann, S.R. & Bradley, A. A null c-myc mutation  
804 causes lethality before 10.5 days of gestation in homozygotes and reduced fertility in  
805 heterozygous female mice. *Genes Dev* **7**, 671-82 (1993).
- 806 23. Xiao, X. et al. HSF1 is required for extra-embryonic development, postnatal growth and  
807 protection during inflammatory responses in mice. *EMBO J* **18**, 5943-52 (1999).
- 808 24. Dai, C., Whitesell, L., Rogers, A.B. & Lindquist, S. Heat shock factor 1 is a powerful  
809 multifaceted modifier of carcinogenesis. *Cell* **130**, 1005-18 (2007).
- 810 25. Yao, J. et al. Combined cDNA array comparative genomic hybridization and serial analysis  
811 of gene expression analysis of breast tumor progression. *Cancer Res* **66**, 4065-78 (2006).
- 812 26. Brusselaers, N., Ekwall, K. & Durand-Dubief, M. Copy number of 8q24.3 drives HSF1  
813 expression and patient outcome in cancer: an individual patient data meta-analysis. *Hum*  
814 *Genomics* **13**, 54 (2019).
- 815 27. Tang, Z., Kang, B., Li, C., Chen, T. & Zhang, Z. GEPIA2: an enhanced web server for large-  
816 scale expression profiling and interactive analysis. *Nucleic Acids Res* **47**, W556-W560  
817 (2019).
- 818 28. Bahram, F., von der Lehr, N., Cetinkaya, C. & Larsson, L.G. c-Myc hot spot mutations in  
819 lymphomas result in inefficient ubiquitination and decreased proteasome-mediated turnover.  
820 *Blood* **95**, 2104-10 (2000).
- 821 29. Lee, J. et al. Activation of MYC, a bona fide client of HSP90, contributes to intrinsic  
822 ibrutinib resistance in mantle cell lymphoma. *Blood Adv* **2**, 2039-2051 (2018).
- 823 30. Dai, S. et al. Suppression of the HSF1-mediated proteotoxic stress response by the metabolic

- 824 stress sensor AMPK. *EMBO J* **34**, 275-93 (2015).
- 825 31. Su, K.H. et al. HSF1 critically attunes proteotoxic stress sensing by mTORC1 to combat  
826 stress and promote growth. *Nat Cell Biol* **18**, 527-39 (2016).
- 827 32. Skene, P.J. & Henikoff, S. An efficient targeted nuclease strategy for high-resolution  
828 mapping of DNA binding sites. *Elife* **6**(2017).
- 829 33. Varlakhanova, N.V. & Knoepfler, P.S. Acting locally and globally: Myc's ever-expanding  
830 roles on chromatin. *Cancer Res* **69**, 7487-90 (2009).
- 831 34. Hwang, B.B., Engel, L., Goueli, S.A. & Zegzouti, H. A homogeneous bioluminescent  
832 immunoassay to probe cellular signaling pathway regulation. *Commun Biol* **3**, 8 (2020).
- 833 35. Lai, J.S. & Herr, W. Ethidium bromide provides a simple tool for identifying genuine DNA-  
834 independent protein associations. *Proc Natl Acad Sci U S A* **89**, 6958-62 (1992).
- 835 36. Wang, L. et al. GCN5 Regulates FGF Signaling and Activates Selective MYC Target Genes  
836 during Early Embryoid Body Differentiation. *Stem Cell Reports* **10**, 287-299 (2018).
- 837 37. Lonard, D.M., Tsai, S.Y. & O'Malley, B.W. Selective estrogen receptor modulators 4-  
838 hydroxytamoxifen and raloxifene impact the stability and function of SRC-1 and SRC-3  
839 coactivator proteins. *Mol Cell Biol* **24**, 14-24 (2004).
- 840 38. Herkert, B. & Eilers, M. Transcriptional repression: the dark side of myc. *Genes Cancer* **1**,  
841 580-6 (2010).
- 842 39. Fiaschetti, G. et al. Bone morphogenetic protein-7 is a MYC target with prosurvival  
843 functions in childhood medulloblastoma. *Oncogene* **30**, 2823-35 (2011).
- 844 40. Tachibana, M. et al. G9a histone methyltransferase plays a dominant role in euchromatic  
845 histone H3 lysine 9 methylation and is essential for early embryogenesis. *Genes Dev* **16**,  
846 1779-91 (2002).

- 847 41. Guenther, M.G., Levine, S.S., Boyer, L.A., Jaenisch, R. & Young, R.A. A chromatin  
848 landmark and transcription initiation at most promoters in human cells. *Cell* **130**, 77-88  
849 (2007).
- 850 42. Karmodiya, K., Krebs, A.R., Oulad-Abdelghani, M., Kimura, H. & Tora, L. H3K9 and  
851 H3K14 acetylation co-occur at many gene regulatory elements, while H3K14ac marks a  
852 subset of inactive inducible promoters in mouse embryonic stem cells. *BMC Genomics* **13**,  
853 424 (2012).
- 854 43. Panne, D. The enhanceosome. *Curr Opin Struct Biol* **18**, 236-42 (2008).
- 855 44. Creighton, M.P. et al. Histone H3K27ac separates active from poised enhancers and predicts  
856 developmental state. *Proc Natl Acad Sci U S A* **107**, 21931-6 (2010).
- 857 45. Rahl, P.B. & Young, R.A. MYC and transcription elongation. *Cold Spring Harb Perspect*  
858 *Med* **4**, a020990 (2014).
- 859 46. Konermann, S. et al. Genome-scale transcriptional activation by an engineered CRISPR-  
860 Cas9 complex. *Nature* **517**, 583-8 (2015).
- 861 47. Li, J., Chauve, L., Phelps, G., Briemann, R.M. & Morimoto, R.I. E2F coregulates an  
862 essential HSF developmental program that is distinct from the heat-shock response. *Genes*  
863 *Dev* **30**, 2062-2075 (2016).
- 864 48. Hoj, J.P., Mayro, B. & Pendergast, A.M. The ABL2 kinase regulates an HSF1-dependent  
865 transcriptional program required for lung adenocarcinoma brain metastasis. *Proc Natl Acad*  
866 *Sci U S A* **117**, 33486-33495 (2020).
- 867 49. Mendillo, M.L. et al. HSF1 drives a transcriptional program distinct from heat shock to  
868 support highly malignant human cancers. *Cell* **150**, 549-62 (2012).
- 869 50. Dai, C. et al. Loss of tumor suppressor NF1 activates HSF1 to promote carcinogenesis. *J Clin*

- 870 *Invest* **122**, 3742-54 (2012).
- 871 51. Fok, J.H.L. et al. HSF1 Is Essential for Myeloma Cell Survival and A Promising Therapeutic  
872 Target. *Clin Cancer Res* **24**, 2395-2407 (2018).
- 873 52. Dong, B. et al. Targeting therapy-resistant prostate cancer via a direct inhibitor of the human  
874 heat shock transcription factor 1. *Sci Transl Med* **12**(2020).
- 875 53. Wang, B., Lee, C.W., Witt, A., Thakkar, A. & Ince, T.A. Heat shock factor 1 induces cancer  
876 stem cell phenotype in breast cancer cell lines. *Breast Cancer Res Treat* **153**, 57-66 (2015).
- 877 54. Carpenter, R.L. et al. Combined inhibition of AKT and HSF1 suppresses breast cancer stem  
878 cells and tumor growth. *Oncotarget* **8**, 73947-73963 (2017).
- 879 55. Kim, D., Langmead, B. & Salzberg, S.L. HISAT: a fast spliced aligner with low memory  
880 requirements. *Nat Methods* **12**, 357-60 (2015).
- 881 56. Risso, D., Ngai, J., Speed, T.P. & Dudoit, S. Normalization of RNA-seq data using factor  
882 analysis of control genes or samples. *Nat Biotechnol* **32**, 896-902 (2014).
- 883 57. Love, M.I., Huber, W. & Anders, S. Moderated estimation of fold change and dispersion for  
884 RNA-seq data with DESeq2. *Genome Biol* **15**, 550 (2014).
- 885 58. Chen, E.Y. et al. Enrichr: interactive and collaborative HTML5 gene list enrichment analysis  
886 tool. *BMC Bioinformatics* **14**, 128 (2013).
- 887 59. Langmead, B. & Salzberg, S.L. Fast gapped-read alignment with Bowtie 2. *Nat Methods* **9**,  
888 357-9 (2012).
- 889 60. Meers, M.P., Tenenbaum, D. & Henikoff, S. Peak calling by Sparse Enrichment Analysis for  
890 CUT&RUN chromatin profiling. *Epigenetics Chromatin* **12**, 42 (2019).
- 891 61. Feng, J., Liu, T., Qin, B., Zhang, Y. & Liu, X.S. Identifying CHIP-seq enrichment using  
892 MACS. *Nat Protoc* **7**, 1728-40 (2012).

893 62. McLeay, R.C. & Bailey, T.L. Motif Enrichment Analysis: a unified framework and an  
894 evaluation on ChIP data. *BMC Bioinformatics* **11**, 165 (2010).

895

896

897

898

899

900

901

902

903

904

905

906

907

908

909

910

911

912

913

914

915



# Figure 1

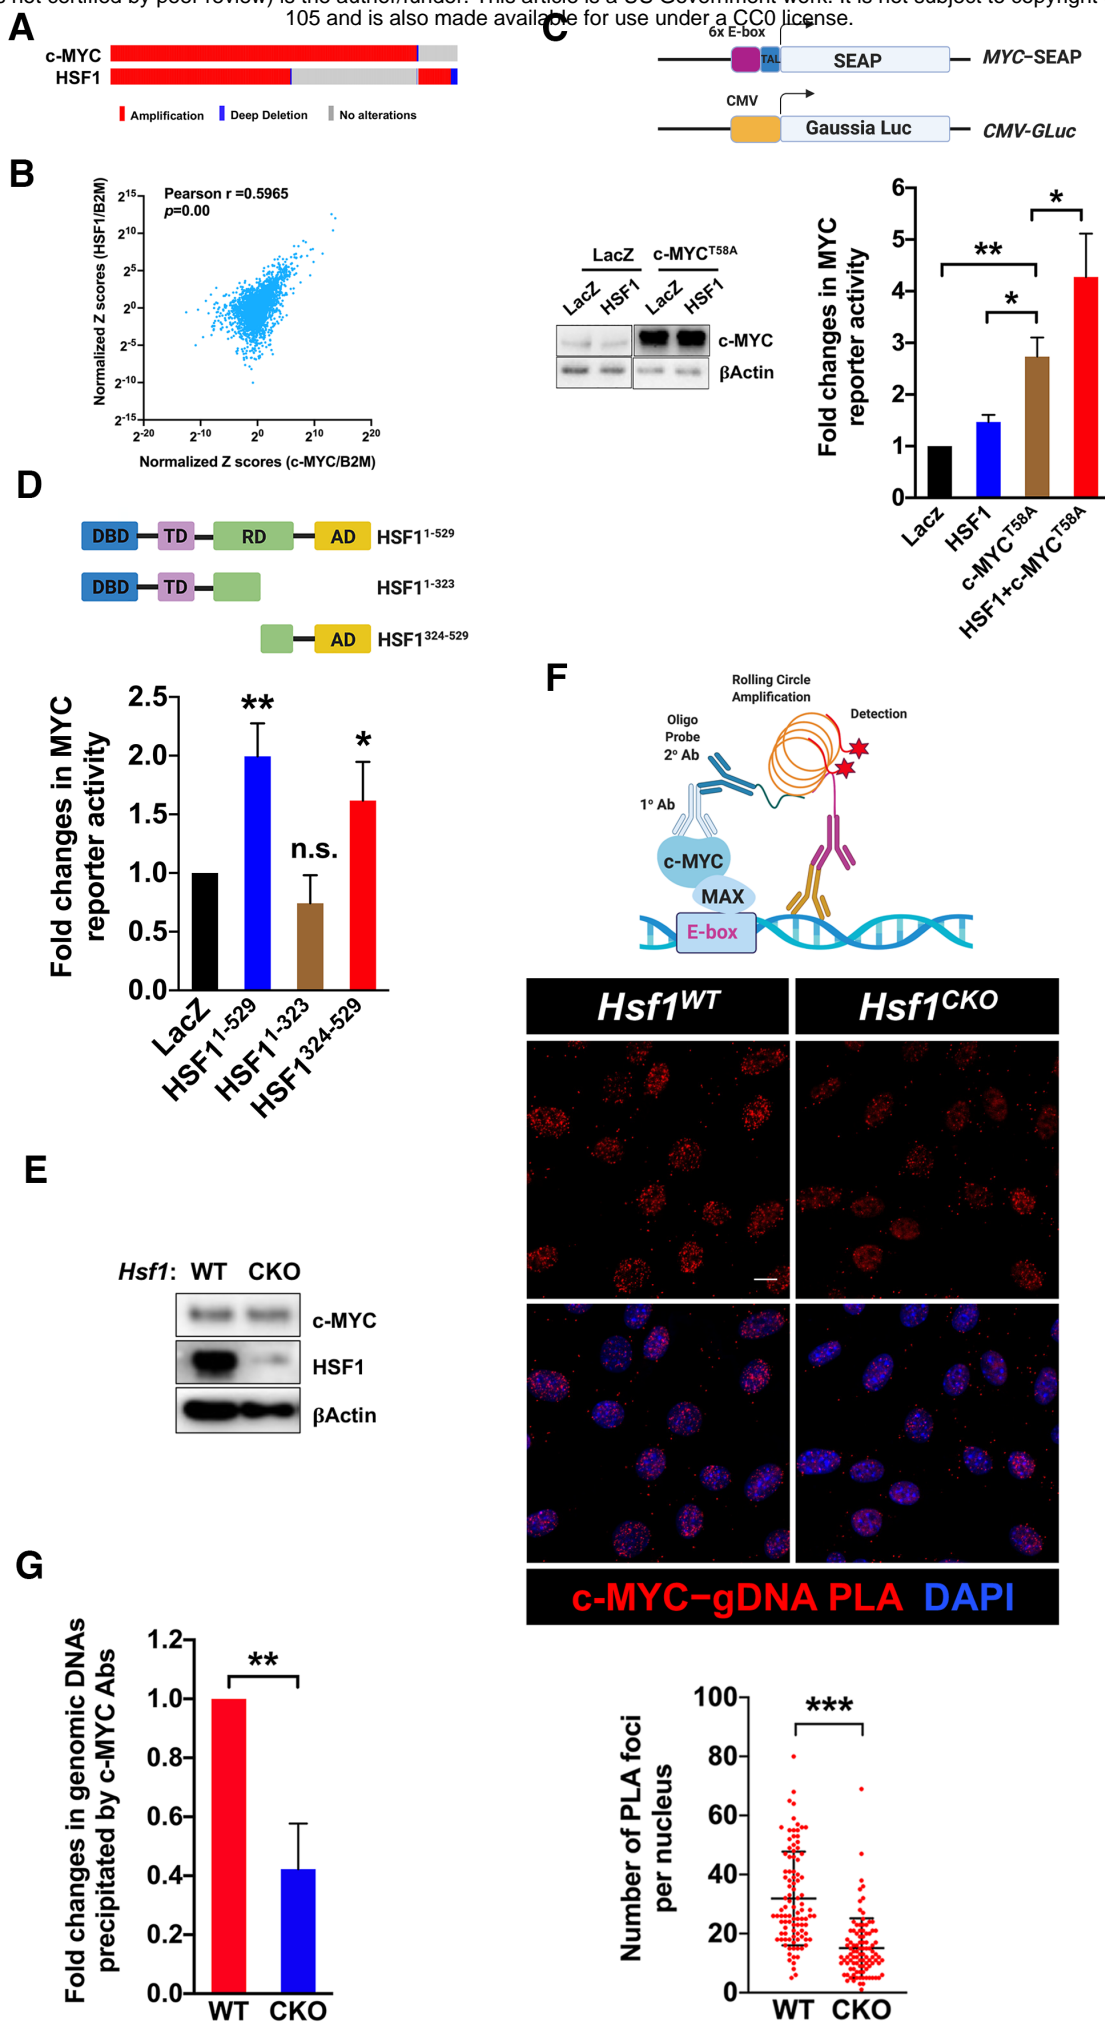

916 **FIGURE LEGENDS**

917

918 **Figure 1. HSF1 is required for robust c-MYC transcriptional activity.**

919 (A) Co-amplification of *c-MYC* and *HSF1* in human cancers. Data are generated by the TGCA  
920 Research Network (<https://www.cancer.gov/tcga>). (B) Positive correlation between *c-MYC* and  
921 *HSF1* mRNA levels in human cancers. Analyses were performed using the GEPIA2 web  
922 server<sup>27</sup>. B2M:  $\beta$ -2-microglobulin. (C) The dual MYC reporter system, comprising an E-box  
923 element-driven SEAP plasmid and a CMV-driven Gaussia luciferase (GLuc) plasmid, were co-  
924 transfected with indicated plasmids into HEK293T cells for 48 hr (mean  $\pm$  SD, n =3 independent  
925 experiments, One-way ANOVA). Cell lysates were immunoblotted. (D) Endogenous c-MYC  
926 activities were measured by the dual reporter system in HEK293T cells co-transfected with  
927 indicated plasmids (mean  $\pm$  SD, n =3 independent experiments, One-way ANOVA). (E) *Hsfl*  
928 was deleted in immortalized *Rosa26-CreERT2*; *Hsfl*<sup>f/f</sup> MEFs treated with and without 4-OHT  
929 for 7 days. c-MYC levels were detected by immunoblotting. (F) Top panel: schematic depiction  
930 of c-MYC-gDNA PLA technique. Middle panel: visualization of endogenous c-MYC binding to  
931 genomic DNAs by PLA (red) in immortalized *Rosa26-CreERT2*; *Hsfl*<sup>f/f</sup> MEFs. Scale bars:  
932 10 $\mu$ m. Lower panel: quantitation of c-MYC-gDNA binding by counting the numbers of PLA  
933 foci per nucleus (mean  $\pm$  SD, n=98 nuclei, Mann Whitney test). (G) Quantitation of c-MYC-  
934 bound genomic DNA fragments following ChIP in immortalized MEFs (mean  $\pm$  SD, n = 3  
935 independent experiments, two-tailed Student's *t* test).

936

937

938

# Figure 2

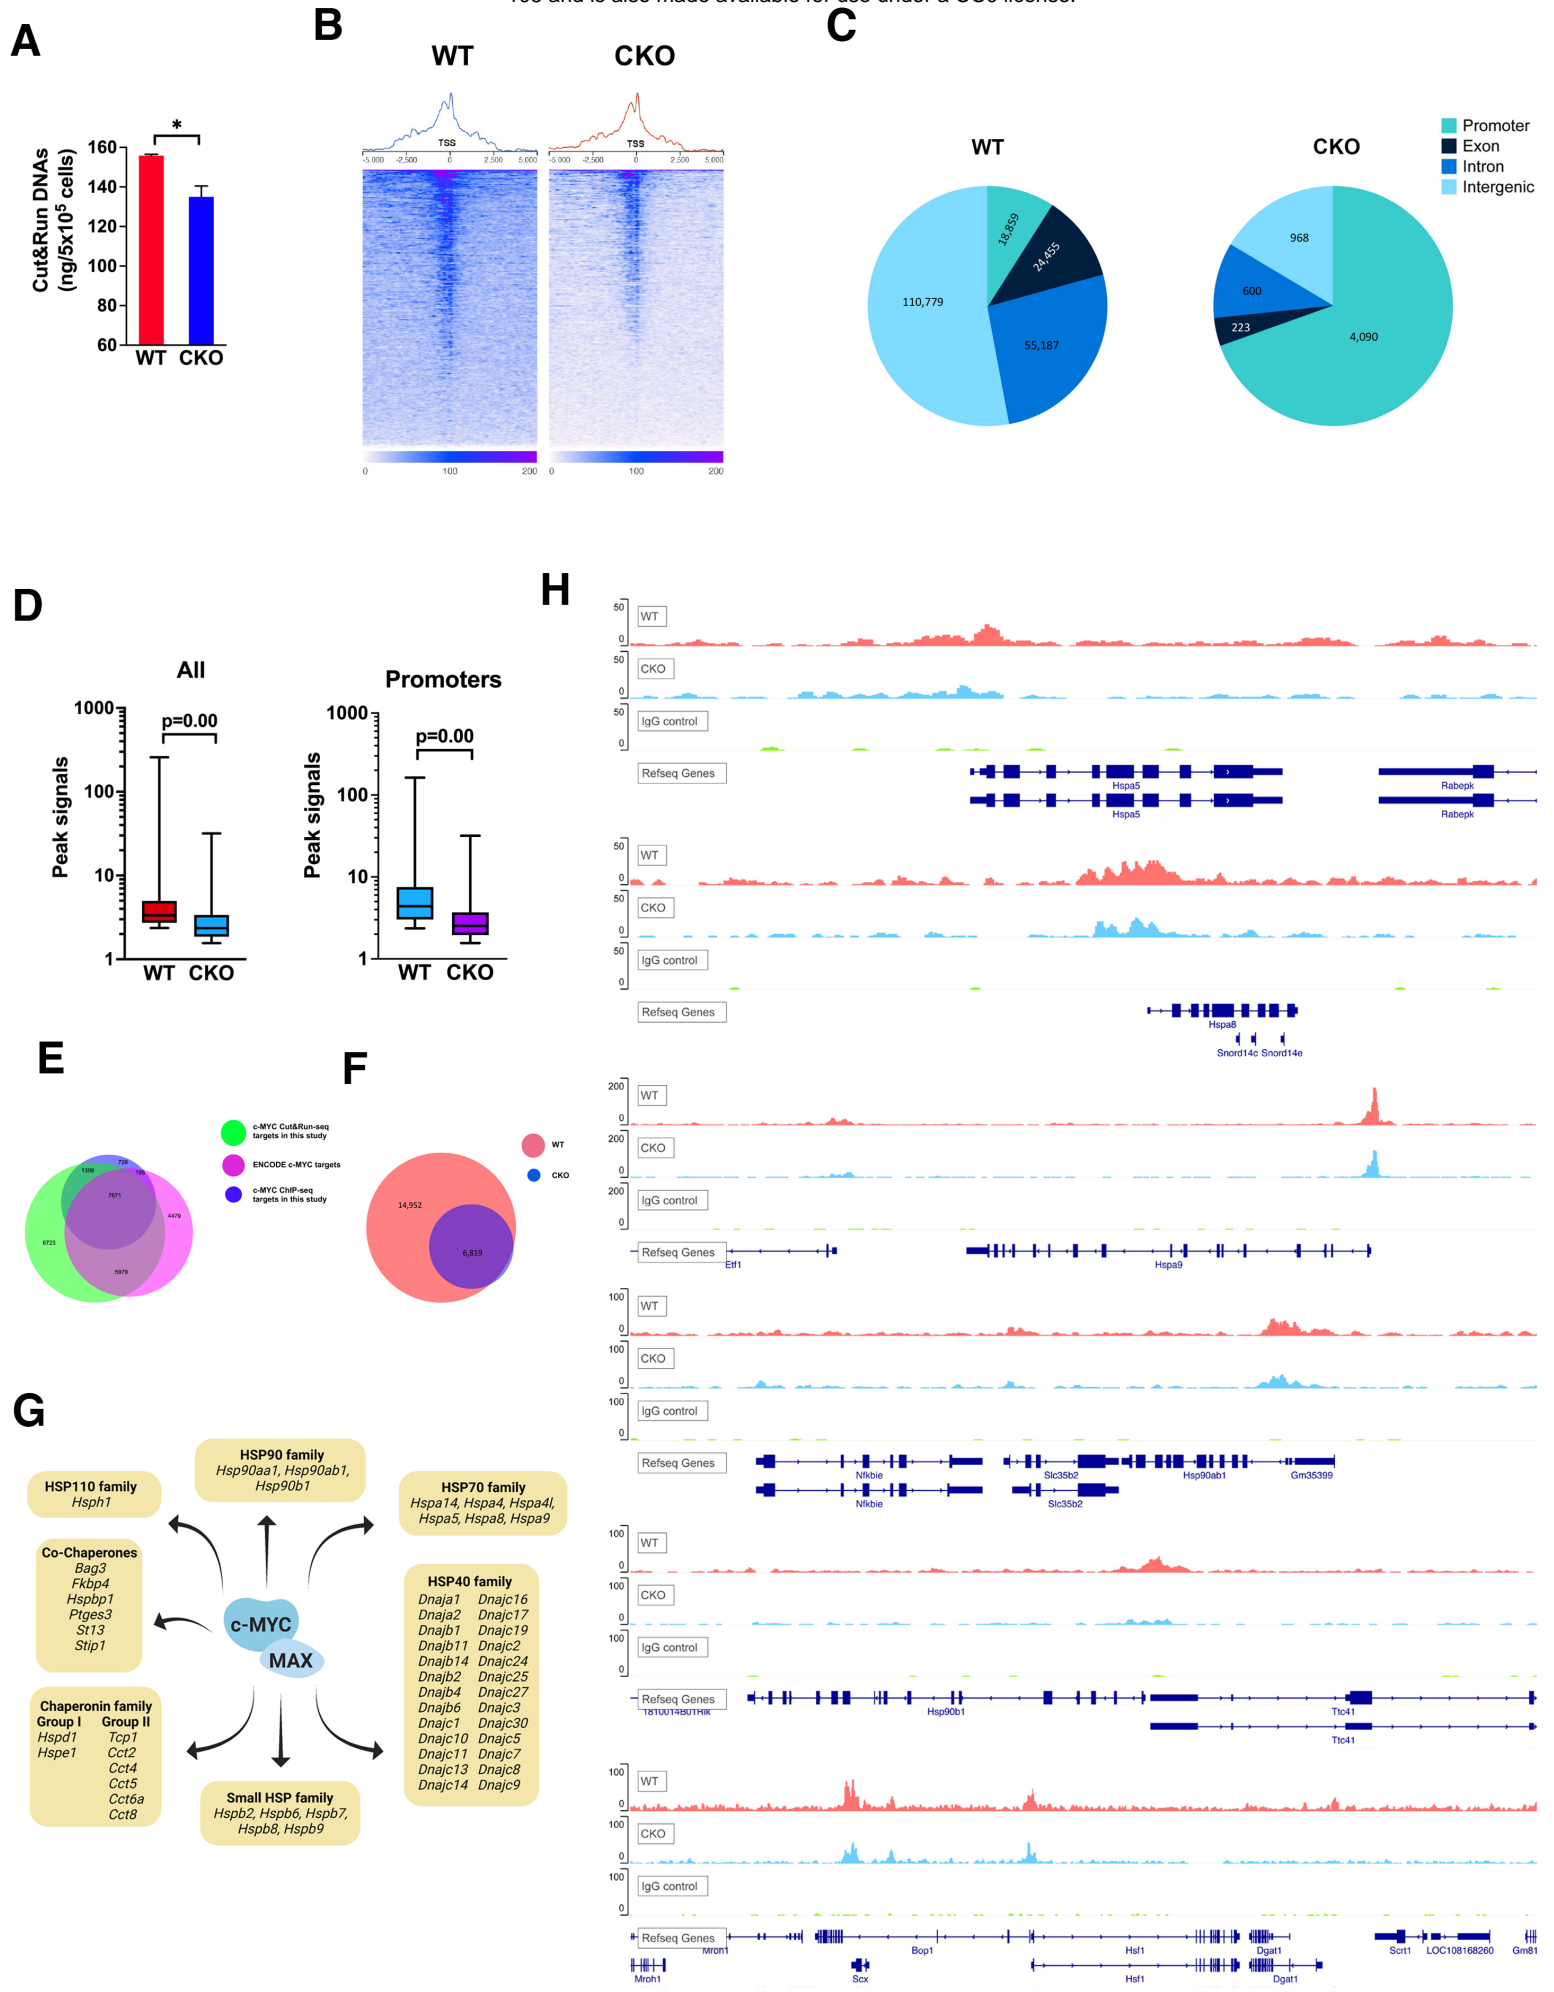

939 **Figure 2: HSF1 promotes c-MYC DNA binding.**

940 (A) Quantitation of released genomic DNA fragments in the CUT&RUN experiments in  
941 immortalized MEFs (mean  $\pm$  SD, n =2 biological replicates, two-tailed Student's *t* test). (B) TSS  
942 plots of aligned CUT&RUN-seq reads following spike-in normalization (two biological  
943 replicates are combined). (C) Genomic distributions of CUT&RUN-seq peaks in *Hsf1*<sup>WT</sup> and  
944 *Hsf1*<sup>CKO</sup> MEFs. (D) Box plots of peak signals in *Hsf1*<sup>WT</sup> and *Hsf1*<sup>CKO</sup> MEFs. The box bounds the  
945 IQR divided by the median and the whiskers extend to the minimum and maximum values  
946 (Mann-Whitney U test). Left: all peaks (n=209,466 WT and 5,900 CKO); Right: peaks within  
947 promoters (n=18,859 WT and 4,090 CKO). (E) Venn diagram showing the overlaps of c-MYC  
948 target genes among different experiments. (F) Venn diagram showing the overlaps of c-MYC  
949 target genes identified by CUT&RUN-seq between *Hsf1*<sup>WT</sup> and *Hsf1*<sup>CKO</sup> MEFs. (G) Summary of  
950 c-MYC target genes encoding chaperones and co-chaperones. (H) Visualization of c-MYC  
951 binding to *Hsp* and *Hsf1* genes

952

953

954

955

956

957

958

959

960

961

## Figure 3

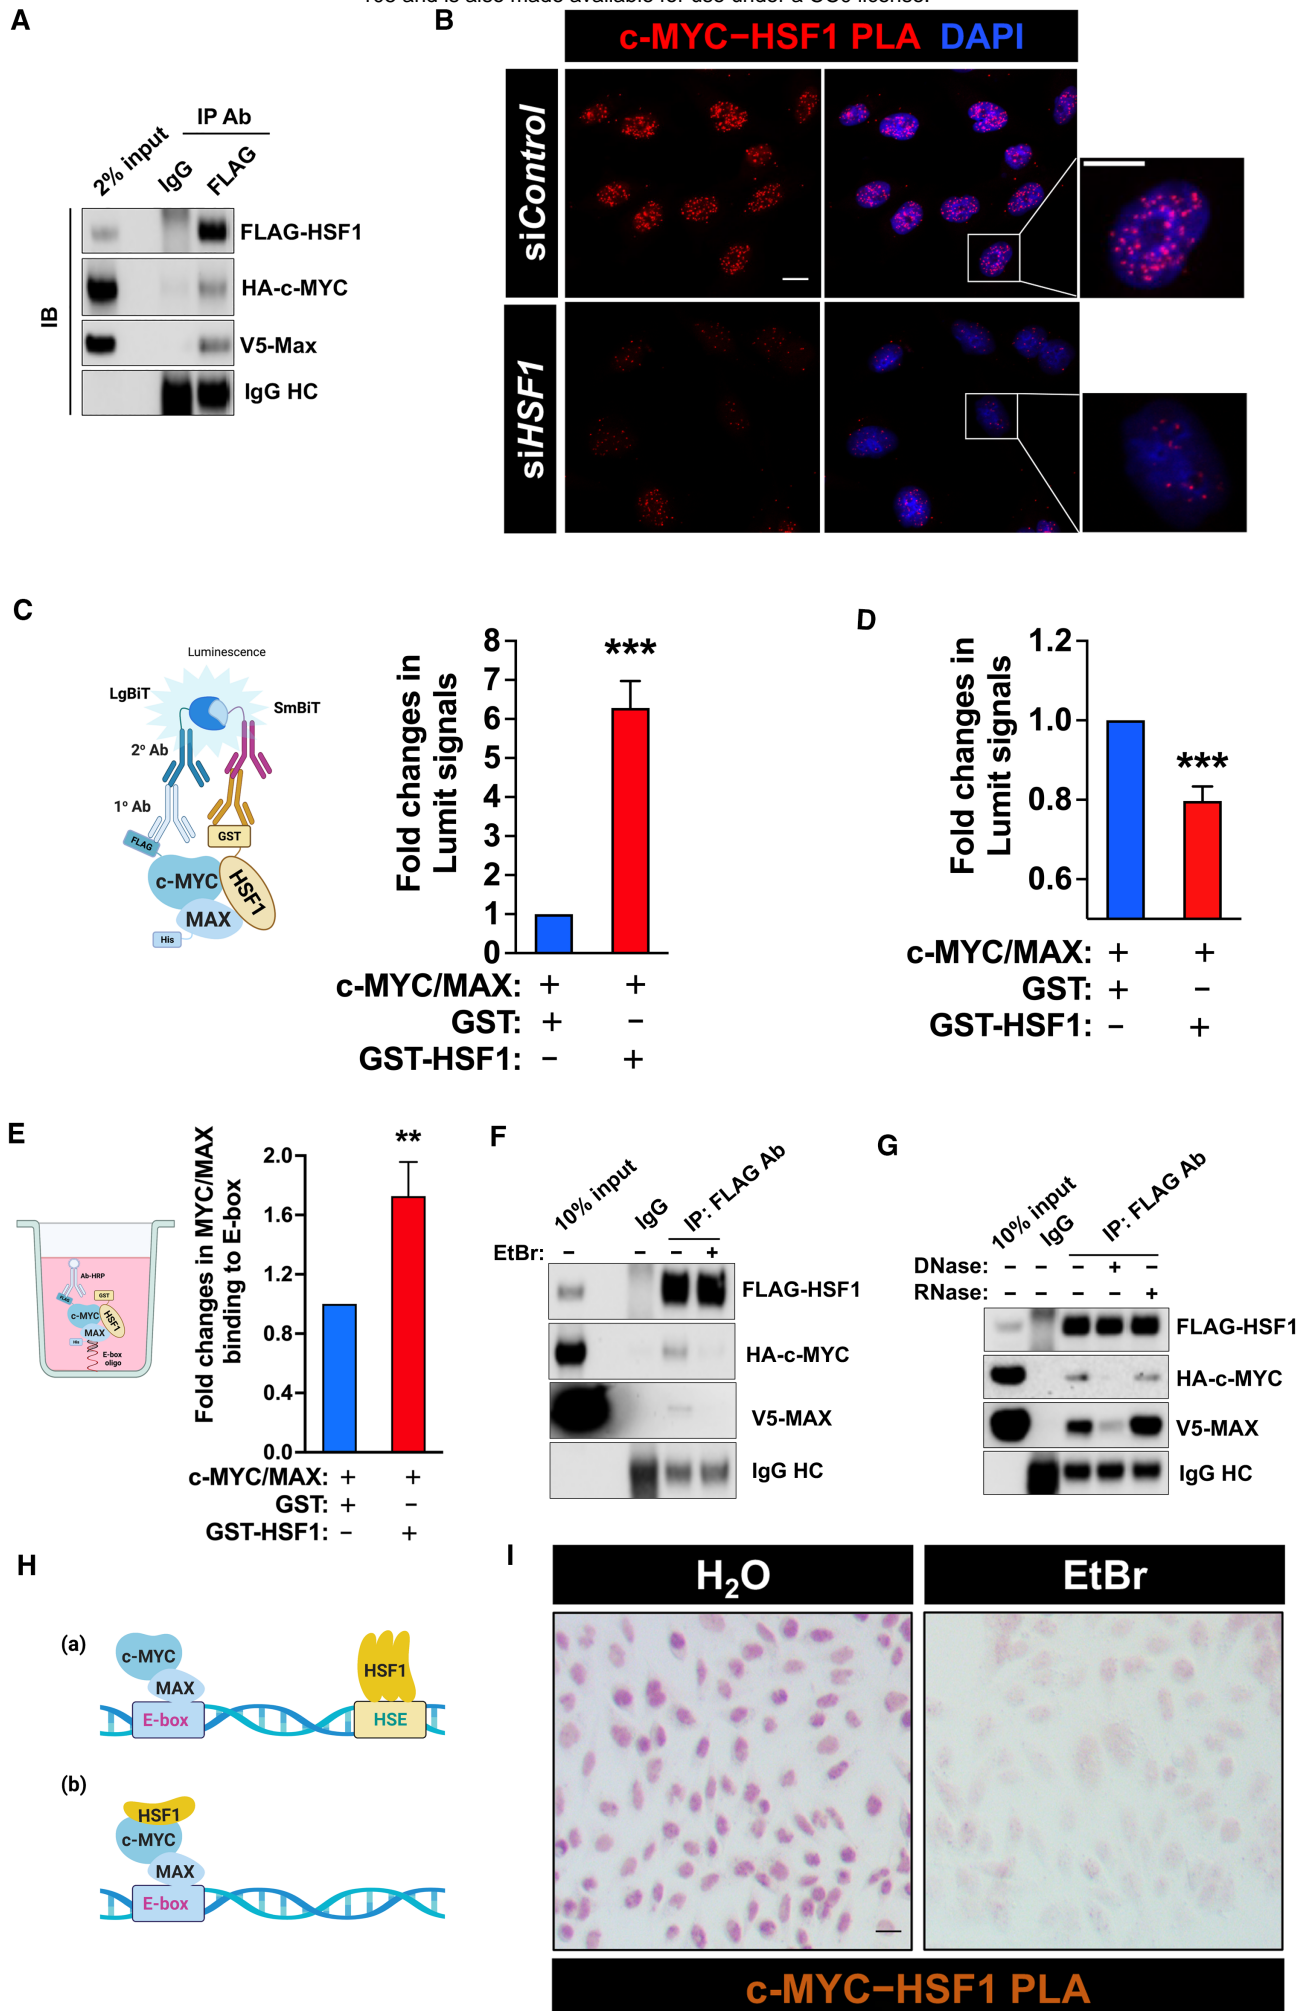

962 **Figure 3. HSF1 physically interacts with c-MYC.**

963 (A) Co-IP of FLAG-HSF1, HA-c-MYC, and V5-MAX from transfected HEK293T cells  
964 (representative images of three independent experiments). HC: heavy chain. (B) Endogenous c-  
965 MYC-HSF1 interactions were detected by PLA in HeLa cells using a rabbit anti-c-MYC  
966 (D3N8F) antibody and a mouse monoclonal anti-HSF1 (E-4) antibody. Scale bars, 10 $\mu$ m. (C) *In*  
967 *vitro* direct interactions between recombinant HSF1 and c-MYC/MAX dimers were detected by  
968 the Lumit<sup>TM</sup> immunoassay. The reactions without primary antibodies were set up as the blanks,  
969 which were subtracted (mean  $\pm$  SD, n =3 independent experiments, two-tailed Student's t test).  
970 (D) *In vitro* interactions between recombinant c-MYC and MAX proteins, with and without  
971 recombinant HSF1 proteins, were detected by the Lumit<sup>TM</sup> immunoassay (mean  $\pm$  SD, n =3  
972 independent experiments, two-tailed Student's t test). (E) *In vitro* binding of recombinant c-  
973 MYC/MAX dimers to E-box oligos, with and without recombinant HSF1 proteins, was detected  
974 by ELISA (mean  $\pm$  SD, n =3 independent experiments, two-tailed Student's t test). (F) Lysates of  
975 HEK293T cells co-transfected with indicated plasmids for 3 days were treated with EtBr (400  
976  $\mu$ g/mL) on ice for 30 min. The interaction of FLAG-HSF1 with HA-c-MYC/V5-MAX was  
977 detected by co-IP (representative images of three independent experiments). (G) Lysates of  
978 HEK293T cells co-transfected with indicated plasmids for 3 days were treated with either 10 U  
979 of DNase I or RNase at 37 °C for 20 min, followed by co-IP (representative images of three  
980 independent experiments). (H) Schematic depiction of two possible models of DNA-dependent  
981 protein-protein interactions. (I) Endogenous c-MYC-HSF1 interactions were detected by  
982 brightfield PLA in HeLa cells, following treatment with or without EtBr (100  $\mu$ g/mL) for 1 hr.  
983 Scale bars: 10 $\mu$ m.  
984

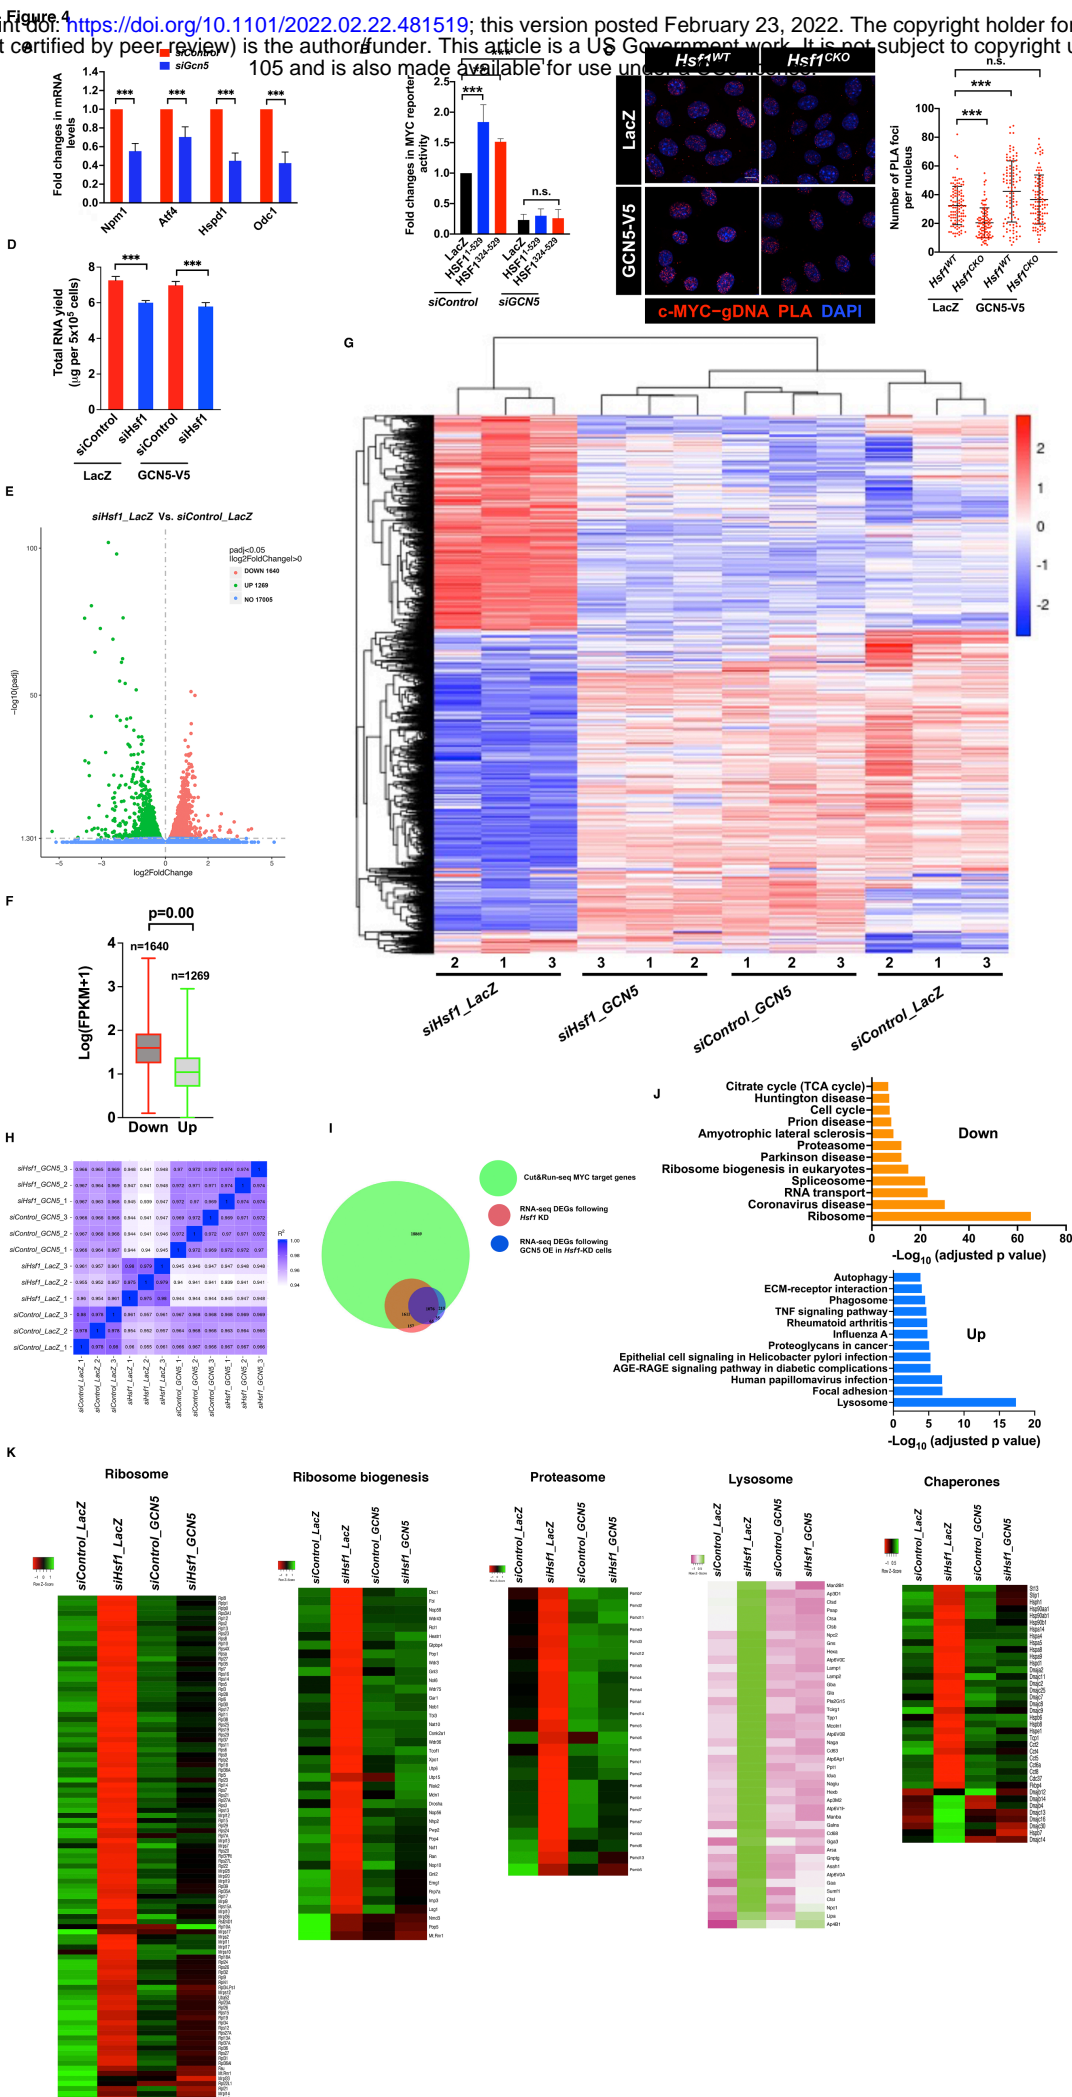

985 **Figure 4: HSF1 activates c-MYC via GCN5.**

986 (A) The expression of known c-MYC target genes was quantitated by qRT-PCR, following  
987 transient *Gcn5* KD for 48 hr in immortalized MEFs (mean  $\pm$  SD, n = 3 independent experiments,  
988 Two-way ANOVA). (B) Endogenous c-MYC transcriptional activities were measured by the  
989 dual reporter system in HEK293T cells transfected with indicated plasmids and siRNAs (mean  $\pm$   
990 SD, n = 3 independent experiments, One-way ANOVA). (C) Left panel: Endogenous c-MYC  
991 binding to gDNA binding was detected by PLA in immortalized MEFs stably expressing *LacZ* or  
992 *GCN5*. Scale bars, 10  $\mu$ m. Right panel: quantitation of these PLA foci per nucleus (mean  $\pm$  SD,  
993 n $\geq$ 100 nuclei, One-way ANOVA). (D) Quantitation of total RNAs extracted with immortalized  
994 MEFs stably expressing *LacZ* or *GCN5* (mean  $\pm$  SD, n = 3 biological replicates, One-way  
995 ANOVA). (E) Volcano plot of the differentially expressed genes due to *Hsf1* KD. (F) Box-and-  
996 whisker plots of the abundance of DEGs in the control cells (n=1,640 or 1,269, Mann-Whitney U  
997 test). The box bounds the IQR divided by the median and the whiskers extend to the minimum  
998 and maximum values. (G) Visualization of DEGs in MEFs expressing different genes and  
999 siRNAs by clustering heatmaps (three biological replicates each group). (H) Seaborn correlation  
1000 heatmap of gene expression among different experimental groups. (I) Venn diagram showing the  
1001 overlaps among the c-MYC CUT&RUN-seq target genes, the DEGs following *Hsf1* KD, and the  
1002 DEGs rescued by *GCN5* overexpression in immortalized MEFs. (J) Pathway enrichment  
1003 analyses of the DEGs in immortalized MEFs following *Hsf1* KD. (K) Heatmap visualization of  
1004 the DEGs involved in the ribosome, proteasome, lysosome, and chaperone pathways (each data  
1005 point represents the average of three biological replicates).

1006

1007



# Figure 5

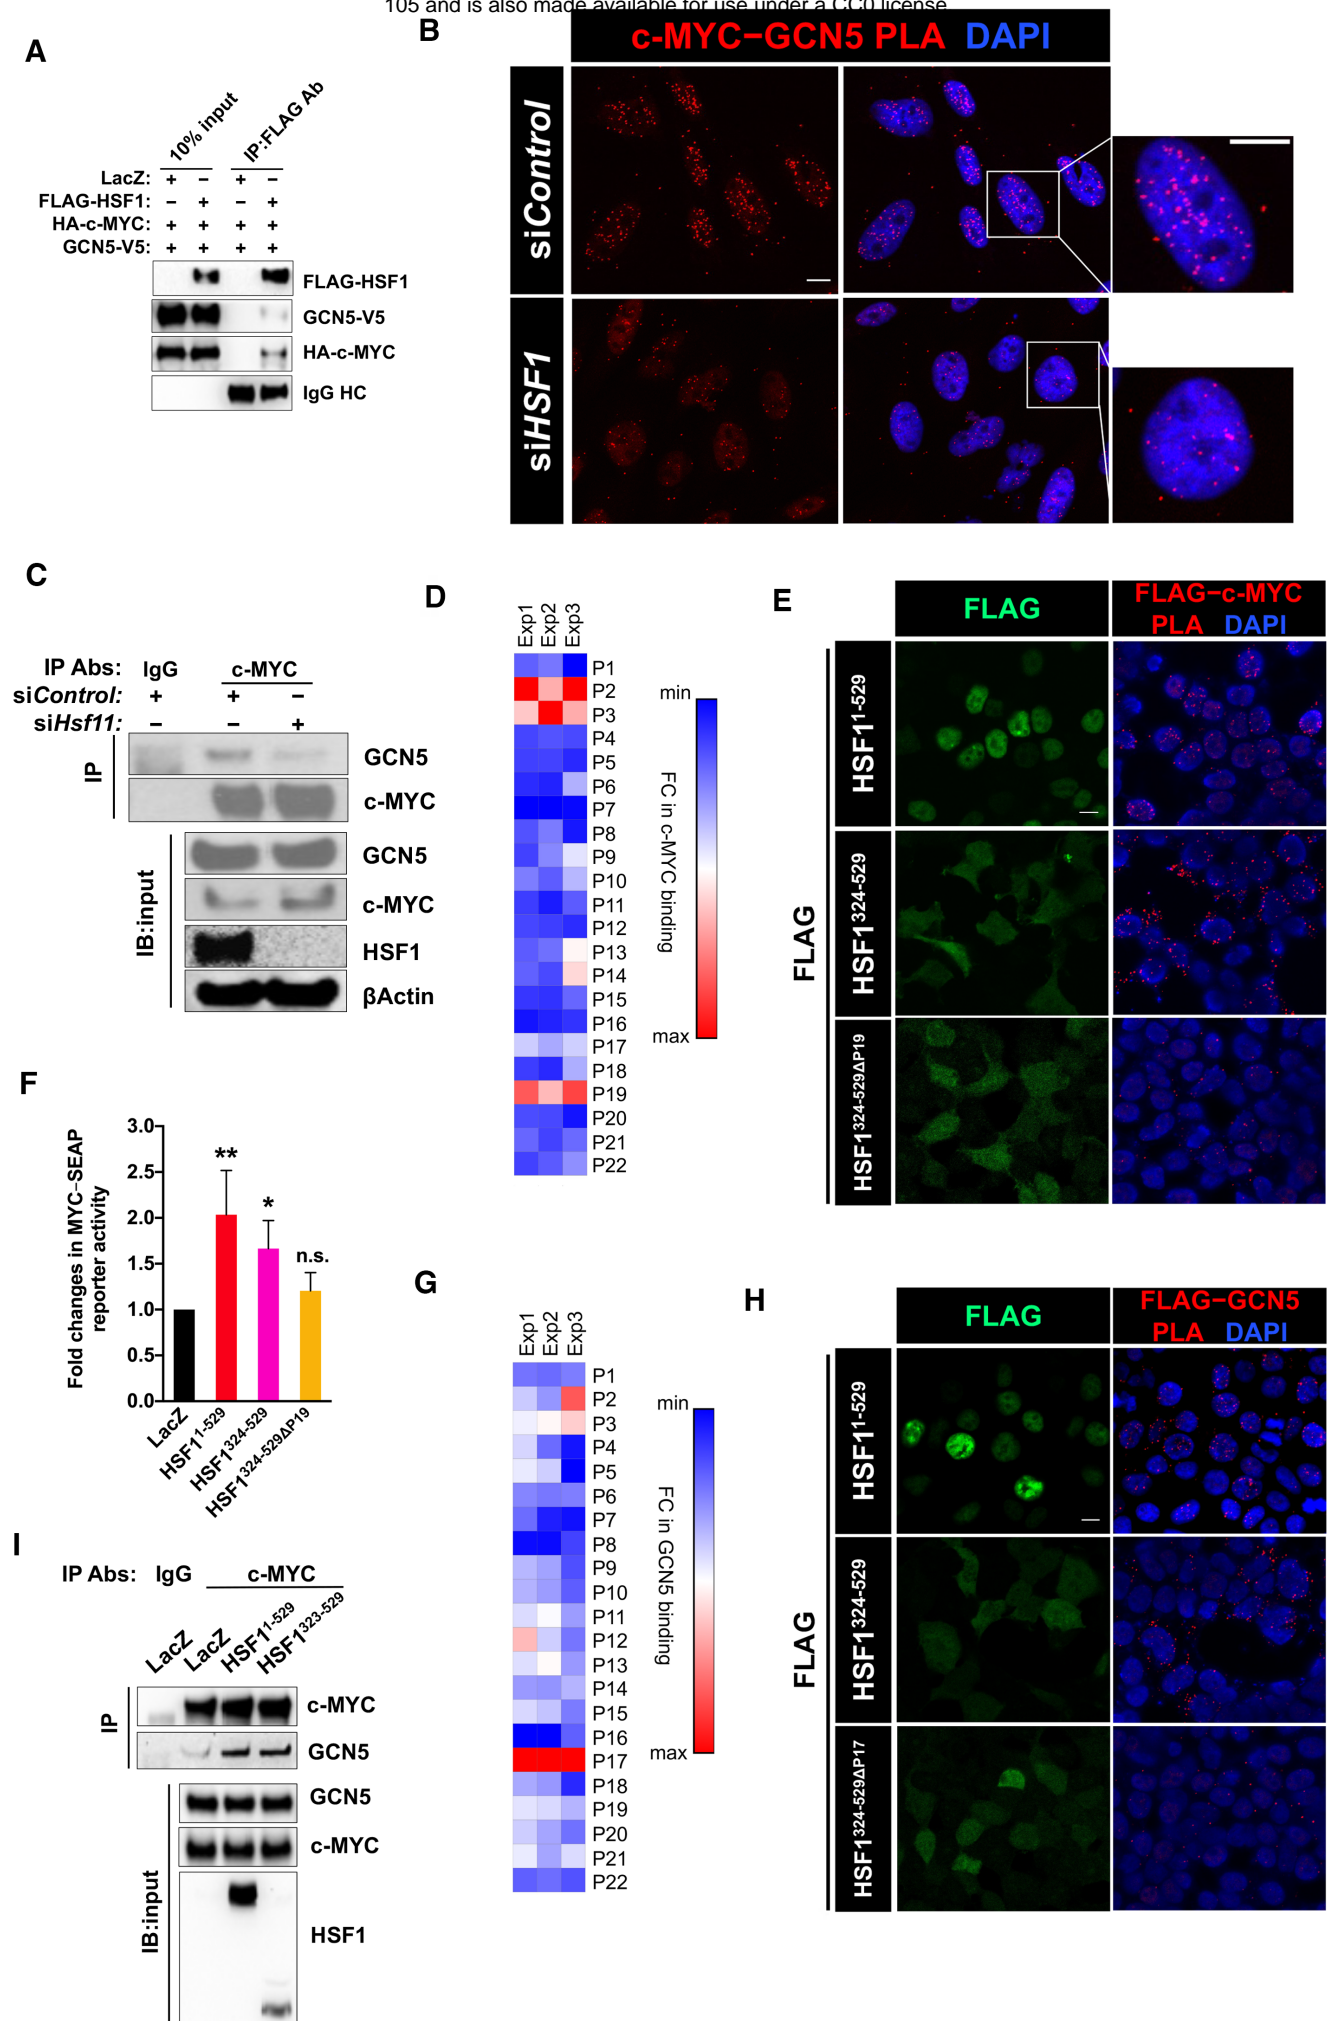

1008 **Figure 5. HSF1 recruits GCN5 to c-MYC.**

1009 (A) Co-IP of FLAG-HSF1, HA-c-MYC, and V5-GCN5 in transfected HEK293T cells  
1010 (representative images of three independent experiments). (B) Endogenous c-MYC-GCN5  
1011 interactions were detected by PLA in HeLa cells. Scale bars, 10  $\mu$ m. (C) Co-IP of endogenous c-  
1012 MYC and GCN5, following transient *Hsf1* KD in immortalized MEFs (representative images of  
1013 three independent experiments). (D) *In vitro* binding of recombinant c-MYC proteins to  
1014 individual HSF1 peptides immobilized on ELISA plates. Fold changes in binding are presented  
1015 as a heatmap (n=3 independent experiments). (E) Visualization of interactions between  
1016 transfected FLAG-HSF1 and endogenous c-MYC by PLA in HEK293T cells using a mouse  
1017 monoclonal anti-FLAG antibody and a rabbit anti-c-MYC antibody. Scale bars, 10  $\mu$ m. (F) c-  
1018 MYC transcriptional activities were measured by the dual reporter system in HEK293T cells co-  
1019 transfected with indicated plasmids (mean  $\pm$  SD, n = 3 independent experiments, One-way  
1020 ANOVA). (G) *In vitro* binding of recombinant GCN5 proteins to individual HSF1 peptides  
1021 immobilized on ELISA plates. Fold changes in binding are presented as a heatmap (n=3  
1022 independent experiments). (H) Visualization of interactions between transfected FLAG-HSF1  
1023 and endogenous GCN5 by PLA in HEK293T cells. Scale bars, 10  $\mu$ m. (I) Co-IP of endogenous  
1024 c-MYC and GCN5 in HEK293T cells transfected with LacZ or FLAG-HSF1 (representative  
1025 images of three independent experiments).

1026

1027

1028

1029

1030

## Figure 6

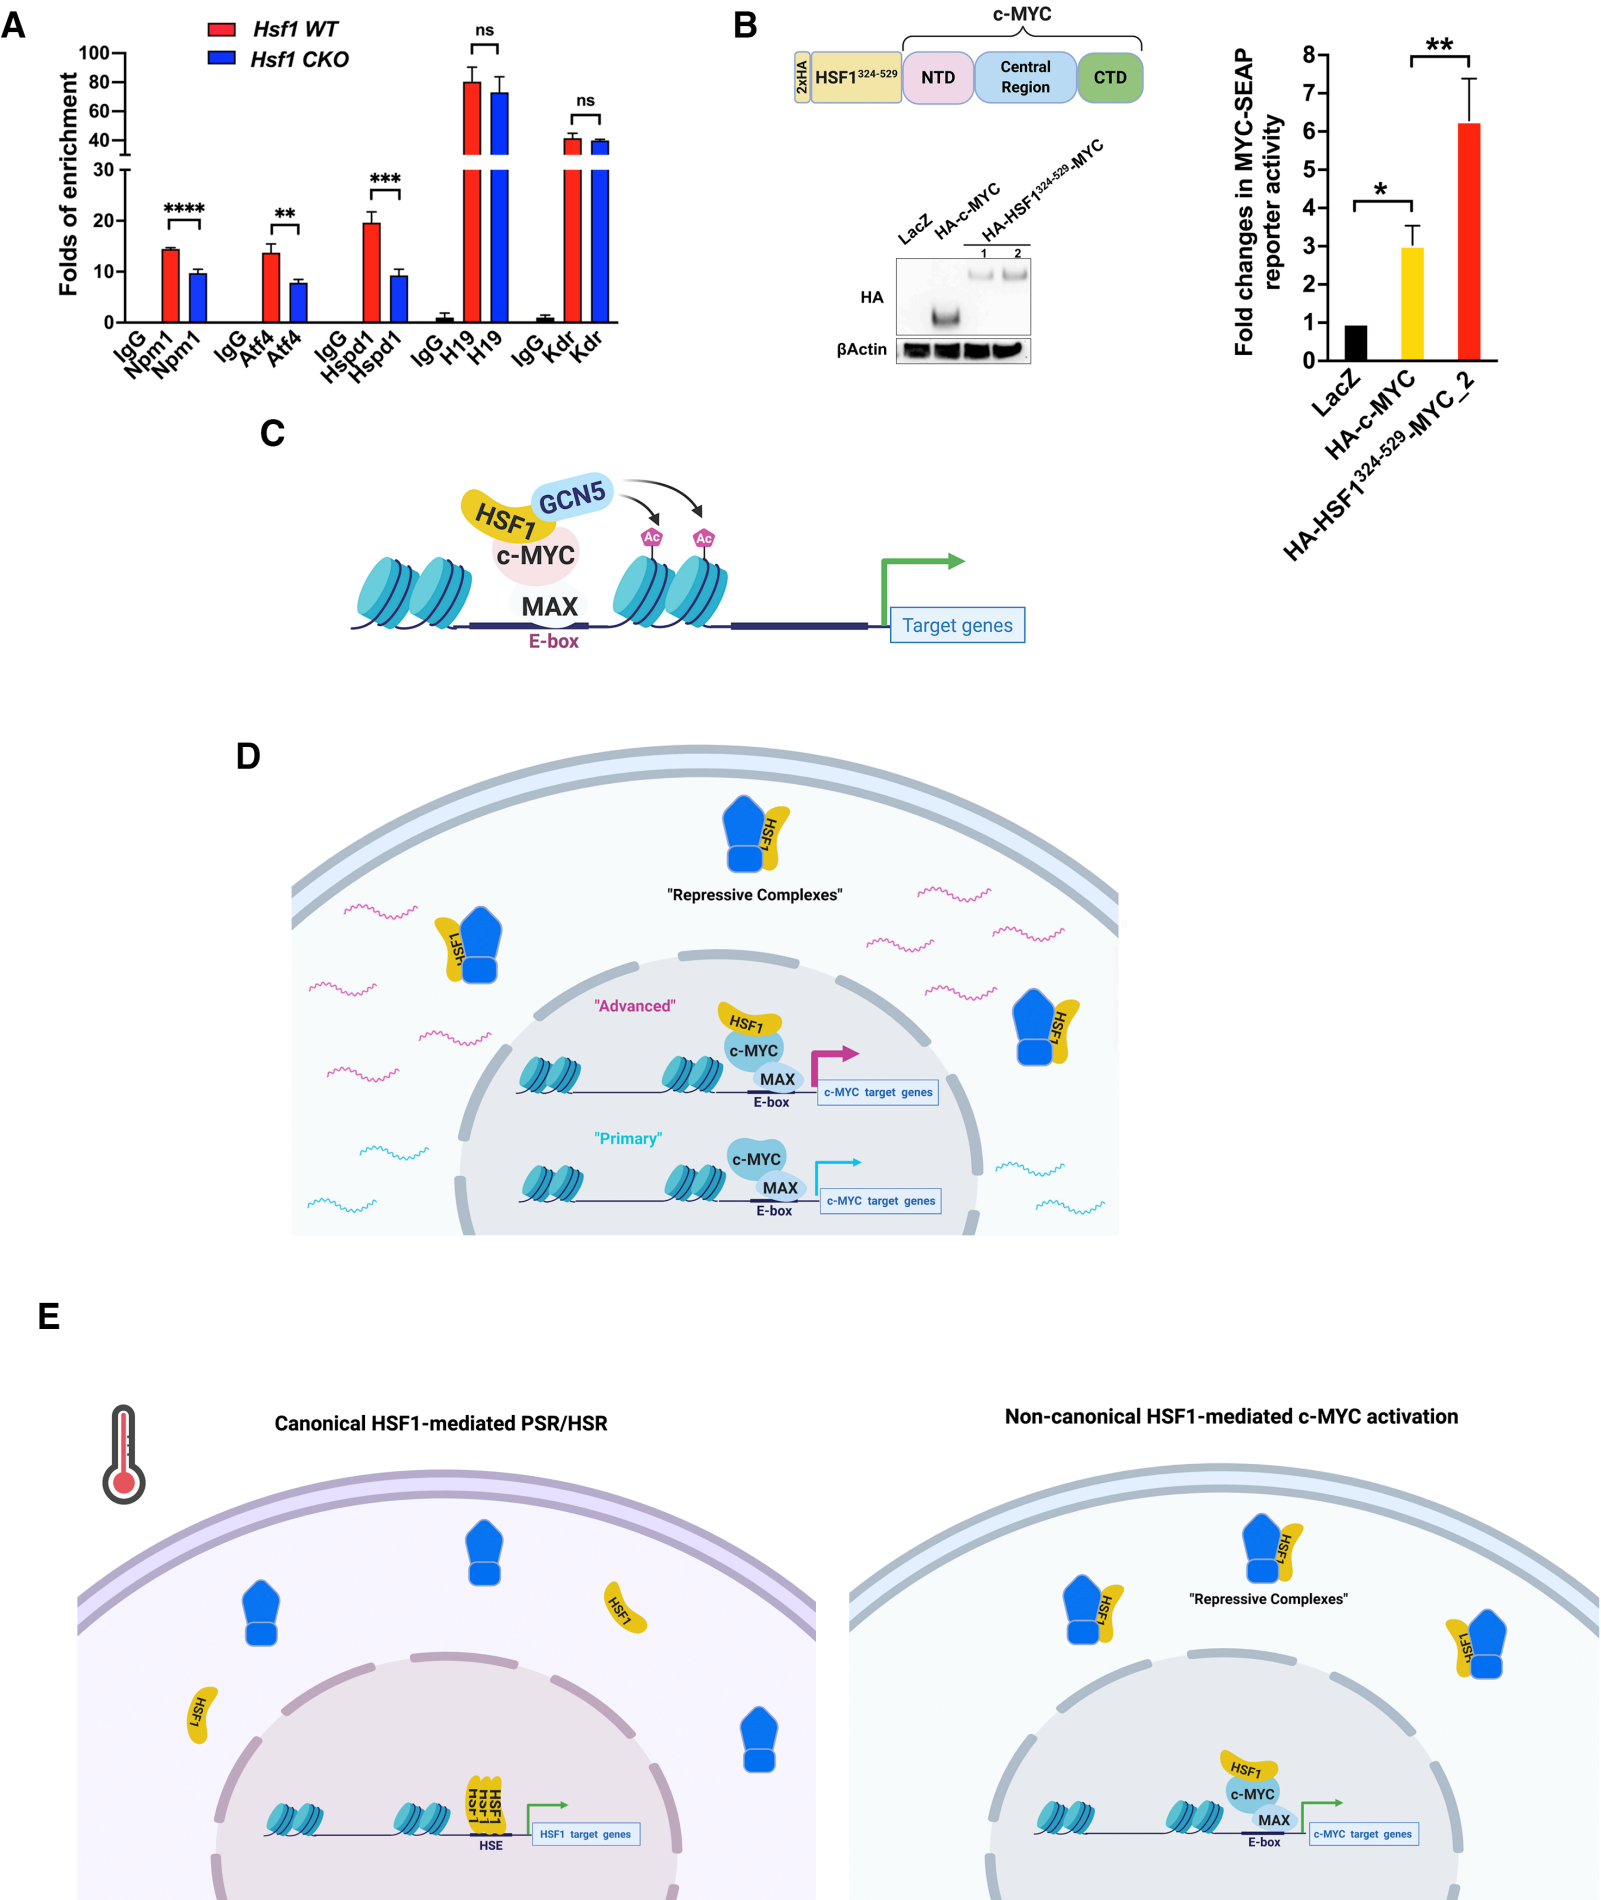

1031 **Figure 6. *Hsf1* deficiency impairs acetylation of histone H3 at c-MYC target loci.**

1032 (A) ChIP-qPCR assays were performed to detect the acetyl-histone 3 (Lys9/Lys14) on c-MYC

1033 target or non-c-MYC target loci in immortalized MEFs (mean  $\pm$  SD, n = 3 biological replicates,

1034 One-way ANOVA). (B) Left panel: the protein expression of fusion between HA-HSF1<sup>324-529</sup> and

1035 c-MYC was detected by immunoblotting. Right panel: the transcriptional activity of fusion

1036 proteins was measured by the dual reporter system (mean  $\pm$  SD, n = 3 independent experiments,

1037 One-way ANOVA). (C) The proposed model of HSF1-mediated c-MYC activation. HSF1 helps

1038 recruit GCN5 to c-MYC, thereby promoting chromatin remodeling and potentiating the c-MYC-

1039 mediated transcription. (D) HSF1 regulates two distinct activation states of c-MYC. Without

1040 HSF1 association, the transcriptional activity of cellular c-MYC remains low, sustaining at a

1041 primary state; by contrast, HSF1 association renders c-MYC highly active, transiting to an

1042 advanced state. (E) HSF1 governs at least two discrete transcriptional programs. Upon its

1043 activation, either in the face of environmental stress or within malignant cells, HSF1 initiates the

1044 canonical PSR/HSR, a mechanism of action depending on HSE binding. By contrast, in the

1045 absence of environmental stress most cellular HSF1 remains repressed; however, some HSF1

1046 associates with c-MYC and potentiates its mediated transcription, a mechanism of action

1047 independent of HSE binding.
